# Supplementary material
Source: PubMed Central journal article supplement (PMC5831469)
Supplement: jamasurg-152-139-s001.pdf [file jamasurg-152-139-s001.pdf]

## Supplementary Online Content

Tedesco D, Gori D, Desai KR, et al. Drug-free interventions to reduce pain or opioid consumption after total knee arthroplasty: a systematic review and meta-analysis. *JAMA Surg*. Published online August 16, 2017. doi:10.1001/jamasurg.2017.2872

eTable 1. Risk of Bias Summary From Randomized Clinical Trials for Non-Pharmacological Postoperative Pain Management After Total Knee Arthroplasty

eTable 2. GRADE of Evidence Assessment for Non-Pharmacological Postoperative Pain Management After Total Knee Arthroplasty

eTable 3. Summary of Key Review Findings for Non-Pharmacological Postoperative Pain Management After Total Knee Arthroplasty

eFigure 1. PRISMA Flowchart Depicting the Search Strategy

eFigure 2. Pain Relief: Cryotherapy

eFigure 3. Pain Relief: Continuous Passive Motion (CPM)

eFigure 4. Pain Relief: Continuous Passive Motion (CPM)

eFigure 5. Pain Relief: Preoperative Exercise

eFigure 6. NSAID Consumption: Cryotherapy

eFigure 7. Opioid Consumption: Acupuncture

eFigure 8. Opioid Consumption: Continuous Passive Motion (CPM)

eFigure 9. Acupuncture

eFigure 10. Subgroup Sensitivity Analysis Comparing Studies Based on Allocation Concealment and Random Sequence Generation

eFigure 11. Subgroup Sensitivity Analysis Comparing Studies Based on Allocation Concealment and Random Sequence Generation

eFigure 12. Subgroup Sensitivity Analysis Comparing Studies Based on Allocation Concealment and Random Sequence Generation

eFigure 13. Subgroup Sensitivity Analysis Comparing Studies Based on Allocation Concealment and Random Sequence Generation

eFigure 14. Subgroup Sensitivity Analysis Comparing Studies Based on Allocation Concealment and Random Sequence Generation

eFigure 15. Subgroup Sensitivity Analysis Comparing Studies Based on Allocation Concealment and Random Sequence Generation

eFigure 16. Subgroup Sensitivity Analysis Comparing Studies Based on Allocation Concealment and Random Sequence Generation

eFigure 17. Subgroup Sensitivity Analysis Comparing Studies Based on Allocation Concealment and Random Sequence Generation

eFigure 18. Subgroup Sensitivity Analysis Comparing Studies Based on Allocation Concealment and Random Sequence Generation

eFigure 19. Subgroup Sensitivity Analysis Comparing Studies Based on Allocation Concealment and Random Sequence Generation

eFigure 20. Subgroup Sensitivity Analysis Comparing Studies Based on How Pain Outcome Was Considered (Either Primary or Secondary)

eFigure 21. Subgroup Sensitivity Analysis Comparing Studies Based on How Pain Outcome Was Considered (Either Primary or Secondary)

eFigure 22. Subgroup Sensitivity Analysis Comparing Studies Based on How Pain Outcome Was Considered (Either Primary or Secondary)

eFigure 23. Subgroup Sensitivity Analysis Comparing Studies Based on How Pain Outcome Was Considered (Either Primary or Secondary)

eFigure 24. Funnel Plot of Comparison for CPM Trials Measured in Terms of Reported Points in the VAS Scale at 1 Week

eFigure 25. Funnel Plot of Comparison for CPM Trials Measured in Terms of Opioid Consumption (mg/kg/48 Hours of Morphine Equivalent)

eFigure 26. Funnel Plot of Comparison for Cryotherapy Trials Measured in Terms of Reported Points in the VAS Scale

eFigure 27. Funnel Plot of Comparison for Cryotherapy Trials Measured in Terms of Opioid Consumption (mg/kg/48 Hours of Morphine Equivalent)

eFigure 28. Funnel Plot of Comparison for Electrotherapy Trials Measured in Terms of Reported Points in the VAS Scale at 1 Week

eFigure 29. Funnel Plot of Comparison for Acupuncture Trials Measured in Terms of Reported Points in the VAS Scale at 1 Week

eFigure 30. Subgroup Sensitivity Analysis Comparing Studies by Type of Control

eFigure 31. Subgroup Sensitivity Analysis Comparing Studies by Type of Control

eFigure 32. Subgroup Sensitivity Analysis Comparing Studies by Type of Control

eFigure 33. Subgroup Sensitivity Analysis Comparing Studies by Type of Control

eFigure 34. Subgroup Sensitivity Analysis Comparing Studies by Type of Control

eFigure 35. Subgroup Sensitivity Analysis Comparing Studies by Type of Control

eFigure 36. Subgroup Sensitivity Analysis Comparing Studies by Type of Control

eFigure 37. Subgroup Sensitivity Analysis Comparing Studies by Type of Control

eFigure 38. Subgroup Sensitivity Analysis Comparing Studies by Type of Control

eFigure 39. Subgroup Sensitivity Analysis Comparing Studies by Time (Studies Divided If Published Prior or Comprising Year 2000 or From 2001 Onwards)

eFigure 40. Subgroup Sensitivity Analysis Comparing Studies by Time (Studies Divided If Published Prior or Comprising Year 2000 or From 2001 Onwards)

eFigure 41. Results of the Meta-Regression for the Distribution of Age in the Groups (Treatment vs Control)

eFigure 42. Results of the Meta-Regression for the Distribution of Sex in the Groups (Treatment vs Control)

This supplementary material has been provided by the authors to give readers additional information about their work.

**eTable 1.** Risk of Bias Summary from Randomized Controlled Trials for Non-pharmacological Postoperative Pain Management after Total Knee Arthroplasty.

| <b>Study</b>                     | <b>Random sequence generation</b> | <b>Allocation concealment</b> | <b>Incomplete outcome data</b> | <b>Selective outcome reporting</b> | <b>Other sources of bias</b> | <b>Blinding</b> |
|----------------------------------|-----------------------------------|-------------------------------|--------------------------------|------------------------------------|------------------------------|-----------------|
| <i>Adravanti et al. (2013)</i>   | Low                               | High                          | Unclear                        | High                               | Low                          | High            |
| <i>Albrecht et al. (2008)</i>    | Unclear                           | Unclear                       | Low                            | Unclear                            | Unclear                      | High            |
| <i>Beauprè et al. (2001)</i>     | Unclear                           | Unclear                       | Low                            | Unclear                            | Low                          | High            |
| <i>Bennett et al. (2005)</i>     | Low                               | Low                           | Low                            | High                               | Low                          | High            |
| <i>Borckardt et al. (2013)</i>   | Low                               | Low                           | Low                            | Unclear                            | Low                          | High            |
| <i>Bruun-Olsen et al. (2009)</i> | High                              | Low                           | Low                            | Low                                | Unclear                      | High            |
| <i>Calatayud et al. (2016)</i>   | Low                               | Low                           | Low                            | Low                                | Unclear                      | High            |
| <i>Chen et al. (2013)</i>        | High                              | High                          | Unclear                        | Unclear                            | Low                          | High            |
| <i>Chen et al. (2015)</i>        | Unclear                           | Unclear                       | Low                            | Unclear                            | Unclear                      | High            |
| <i>Colwell et al. (1992)</i>     | Unclear                           | Unclear                       | Low                            | High                               | Low                          | High            |
| <i>Denis et al. (2006)</i>       | Low                               | Low                           | Low                            | Low                                | Low                          | High            |
| <i>Gibbons et al. (2001)</i>     | Unclear                           | Unclear                       | Low                            | High                               | Low                          | High            |

|                                 |         |         |         |         |         |         |
|---------------------------------|---------|---------|---------|---------|---------|---------|
| <i>Gstoettner et al. (2011)</i> | Low     | Low     | Unclear | Low     | Low     | High    |
| <i>Harms et al. (1991)</i>      | Unclear | Unclear | Unclear | High    | Low     | High    |
| <i>Ivey et al. (1994)</i>       | Low     | Low     | Unclear | Unclear | Unclear | Low     |
| <i>Kim et al. (2009)</i>        | Low     | Unclear | Unclear | Low     | Unclear | High    |
| <i>Kullenberg et al. (2006)</i> | Unclear | Unclear | Low     | High    | Low     | High    |
| <i>Lenssen et al. (2003)</i>    | Low     | Low     | Low     | Low     | Low     | High    |
| <i>Lenssen et al. (2008)</i>    | Low     | Low     | Low     | High    | Low     | High    |
| <i>Levy et al. (1993)</i>       | Unclear | Unclear | Unclear | High    | Low     | Unclear |
| <i>MacDonald et al. (2000)</i>  | Low     | Low     | Unclear | High    | Low     | High    |
| <i>Maniar et al. (2012)</i>     | High    | Low     | Unclear | Low     | High    | High    |
| <i>May et al. (1999)</i>        | Unclear | Low     | Low     | High    | Low     | High    |
| <i>McKay et al. (2012)</i>      | Unclear | High    | Low     | Unclear | Low     | High    |
| <i>McInnes et al. (1992)</i>    | High    | Low     | Low     | Low     | Unclear | High    |
| <i>Mikashima et al. (2012)</i>  | Low     | Low     | Low     | Unclear | Unclear | Unclear |
| <i>Montgomery et al. (1996)</i> | High    | Unclear | Low     | Unclear | Low     | High    |
| <i>Moretti et al. (2012)</i>    | Low     | Low     | High    | High    | Unclear | High    |

|                                |         |         |         |         |         |         |
|--------------------------------|---------|---------|---------|---------|---------|---------|
| <i>Morsi E. (2002)</i>         | High    | High    | Low     | High    | Low     | High    |
| <i>Pope et al. (1997)</i>      | Unclear | Unclear | Low     | Unclear | Unclear | High    |
| <i>Radkowski et al. (2007)</i> | Low     | Unclear | Low     | High    | Low     | Low     |
| <i>Sahin et al. (2006)</i>     | High    | Unclear | Low     | Low     | Unclear | High    |
| <i>Smith et al. (2002)</i>     | High    | Unclear | Low     | Unclear | Unclear | High    |
| <i>Su et al. (2012)</i>        | Unclear | Unclear | Low     | Unclear | Low     | High    |
| <i>Thienpont et al. (2014)</i> | Low     | Low     | Low     | Low     | Unclear | Unclear |
| <i>Tsang et al. (2007)</i>     | Low     | Low     | Low     | High    | Unclear | Unclear |
| <i>Tzeng et al. (2015)</i>     | Unclear | Low     | Unclear | Unclear | Low     | High    |
| <i>Walker et al. (1991)</i>    | Unclear | Unclear | Low     | Unclear | Low     | Unclear |
| <i>Webb et al. (1998)</i>      | Unclear | Unclear | Low     | Unclear | Low     | Unclear |

**eTable 2.** GRADE of Evidence Assessment for Non-pharmacological Postoperative Pain Management after Total Knee Arthroplasty.

| <b>Study Outcome</b>       | <b>Risk of bias</b> | <b>Inconsistency</b> | <b>Indirectness</b> | <b>Imprecision</b> | <b>Publication bias</b> | <b>GRADE</b>    |
|----------------------------|---------------------|----------------------|---------------------|--------------------|-------------------------|-----------------|
| <b>Pain relief – VAS</b>   |                     |                      |                     |                    |                         |                 |
| CPM                        | Very Serious        | Not Serious          | Not Serious         | Serious            | Not Serious             | ⊕<br>Very Low   |
| Cryotherapy                | Very Serious        | Serious              | Not Serious         | Not Serious        | Serious                 | ⊕<br>Very Low   |
| Electrotherapy             | Very Serious        | Serious              | Not Serious         | Not Serious        | Serious                 | ⊕<br>Very Low   |
| Acupuncture                | Serious             | Serious              | Not Serious         | Not Serious        | Not Serious             | ⊕⊕<br>Low       |
| <b>Pain relief – WOMAC</b> |                     |                      |                     |                    |                         |                 |
| CPM                        | Very Serious        | Not Serious          | Not Serious         | Not Serious        | Not Serious             | ⊕⊕<br>Low       |
| Preoperative exercise      | Serious             | Serious              | Not Serious         | Not Serious        | Not Serious             | ⊕⊕<br>Low       |
| <b>Opioid consumption</b>  |                     |                      |                     |                    |                         |                 |
| CPM                        | Serious             | Serious              | Not Serious         | Serious            | Not Serious             | ⊕<br>Very Low   |
| Cryotherapy                | Serious             | Serious              | Not Serious         | Not Serious        | Serious                 | ⊕<br>Very Low   |
| Electrotherapy             | Serious             | Not Serious          | Not Serious         | Not Serious        | Not Serious             | ⊕⊕⊕<br>Moderate |

|                          |              |             |             |             |             |                 |
|--------------------------|--------------|-------------|-------------|-------------|-------------|-----------------|
| Acupuncture              | Serious      | Serious     | Not Serious | Not Serious | Not Serious | ⊕⊕<br>Low       |
| <b>NSAID consumption</b> |              |             |             |             |             |                 |
| Cryotherapy              | Very Serious | Serious     | Not Serious | Serious     | Not Serious | ⊕<br>Very Low   |
| <b>Time to first PCA</b> |              |             |             |             |             |                 |
| Acupuncture              | Serious      | Not Serious | Not Serious | Not Serious | Not Serious | ⊕⊕⊕<br>Moderate |



**eTable 3.** Summary of Key Review Findings for Non-pharmacological Postoperative Pain Management after Total Knee Arthroplasty.

| <b>Study</b>                           | <b>Duration of intervention</b> | <b>Outcome measure timepoints</b> | <b>Primary outcome measure</b> | <b>Secondary outcome measure</b>                                                 | <b>Main findings/Conclusion</b>                                                                                                                                 | <b>Conflict of interest/funding disclosure</b>                                                                                  |
|----------------------------------------|---------------------------------|-----------------------------------|--------------------------------|----------------------------------------------------------------------------------|-----------------------------------------------------------------------------------------------------------------------------------------------------------------|---------------------------------------------------------------------------------------------------------------------------------|
| <b>Continuous passive motion (CPM)</b> |                                 |                                   |                                |                                                                                  |                                                                                                                                                                 |                                                                                                                                 |
| <i>Beauprè et al. (2001)</i>           | 3 days postoperatively (PO)     | 3 and 6 months PO                 | Knee extension and flexion     | WOMAC (Pain, Stiffness, Function), SF36                                          | Self-reported pain, function, or overall quality of life was not different at either of the postoperative measurement times.                                    | Study funded by a grant from the Health Services Research and Innovation Fund, Canada.                                          |
| <i>Bennett et al. (2005)</i>           | 6 days PO                       | 3 months, 1 year PO               | Range of Motion (ROM)          | Length of stay (LOS), Pain, Wound healing, Perceived Health Status Measure SF-12 | Statistically significant differences in mean pain scores between groups. The differences are not clinically significant ( $\leq 1$ point on a 10-point scale). | Funds received in partial or total support of the research material described in this article from the Alfred Grant, Australia. |

|                                  |                       |                                      |                                                      |                                   |                                                                                                                                                                                                     |                                                                                                                                     |
|----------------------------------|-----------------------|--------------------------------------|------------------------------------------------------|-----------------------------------|-----------------------------------------------------------------------------------------------------------------------------------------------------------------------------------------------------|-------------------------------------------------------------------------------------------------------------------------------------|
| <i>Brunn-Olsen et al. (2009)</i> | 6 to 12–14 weeks PO   | 14 weeks, 9 months PO                | Pain (VAS scale)                                     | ROM                               | CPM was not found to have an additional short-time effect compared with physiotherapy. After three months pain relief was obtained.                                                                 | A grant for the study was received from the Norwegian Foundation of Postgraduate Physiotherapists. Conflict of interest not stated. |
| <i>Chen et al. (2013)</i>        | 3 days PO             | 2 weeks, 6 weeks, 3month, 6 month PO | ROM                                                  | Pain                              | No significant difference                                                                                                                                                                           | Project funded by the National Health Research Institute, Taiwan.                                                                   |
| <i>Colwell et al. (1992)</i>     | 3 days PO             | 1, 2 and 3 days PO                   | ROM                                                  | Analgesia use                     | CPM reduces opioid consumption and LOS.                                                                                                                                                             | Not stated.                                                                                                                         |
| <i>Denis et al. (2006)</i>       | 9 days PO             | Discharge                            | ROM (flexion, extension, Timed up and go test - TUG) | WOMAC (Pain, Stiffness, Function) | The results do not support the addition of CPM applications to conventional physical therapy. CPM did not show to further reduce knee impairments or disability or the length of the hospital stay. | Not stated.                                                                                                                         |
| <i>Harms et al. (1991)</i>       | 6hr/day for 1 week PO | Discharge                            | Pain (VAS scale)                                     | ROM, LOS                          | No significant differences found in VAS scores                                                                                                                                                      | Not stated.                                                                                                                         |

|                                |                                         |                                                                                                                                                        |                                                |                                                                                 |                                                                                                    |                                                                                                          |
|--------------------------------|-----------------------------------------|--------------------------------------------------------------------------------------------------------------------------------------------------------|------------------------------------------------|---------------------------------------------------------------------------------|----------------------------------------------------------------------------------------------------|----------------------------------------------------------------------------------------------------------|
| <i>Kim et al. (2009)</i>       | 20 minutes/day, from day 2 to day 14 PO | Flexion contracture and maximum flexion: day 7 after TKA, day 14. 6 weeks, 3 months and 6 months. Level of pain during ROM exercise: day 7 and day 14. | Flexion contracture, maximum flexion           | AKS knee score, AKS function score, WOMAC pain, WOMAC stiffness, WOMAC function | Regular passive ROM exercise does not offer additional clinical benefits to the patients after TKA | Not stated.                                                                                              |
| <i>Lenssen et al. (2003)</i>   | 4 days PO                               | 4days                                                                                                                                                  | Pain (VAS scale)                               | ROM                                                                             | No significant differences found in VAS scores                                                     | Not stated.                                                                                              |
| <i>Lenssen et al. (2008)</i>   | 4 hours/day for 4 days PO               | 17 day, 6 weeks, 3 months                                                                                                                              | Function and pain (WOMAC scale), ROM           | Medication Use, Satisfaction                                                    | No significant differences found in WOMAC scores                                                   | The authors declare that they have no competing interests.                                               |
| <i>MacDonald et al. (2000)</i> | 6 weeks PO                              | 6, 12, 26 weeks, and 1 year PO                                                                                                                         | Function (KSS scale)                           | ROM, Pain                                                                       | No significant differences found in VAS scores                                                     | Not stated                                                                                               |
| <i>Maniar et al. (2012)</i>    | Day 1 and 3 PO                          | 3, 5, 14±2, 42±5, 90±10                                                                                                                                | Pain-VAS, ROM, TUG, swelling and wound healing | WOMAC, SF-12                                                                    | No significant differences found in VAS scores                                                     | The Conflict of Interest disclosure related to this article available at doi:10.1016/j.arth.2011.04.009. |
| <i>May et al. (1999)</i>       | 1 week PO                               | 1 month                                                                                                                                                | ROM, VAS,                                      | LOS                                                                             | No differences at                                                                                  | Not stated.                                                                                              |

|                                 |                                       |                               | KSS                          |                                          | VAS outcome                                                                                                                 |                                                                                                                                       |
|---------------------------------|---------------------------------------|-------------------------------|------------------------------|------------------------------------------|-----------------------------------------------------------------------------------------------------------------------------|---------------------------------------------------------------------------------------------------------------------------------------|
| <i>McInnes et al. (1992)</i>    | Starting within 24 hours from surgery | 7 days, 6 weeks               | Cost                         | Pain (VAS scale), swelling, ROM          | No significant differences found in VAS scores                                                                              | Study supported by National Institutes of Health.                                                                                     |
| <i>Montgomery et al. (1996)</i> | 3 hours 3 times daily, 7 days a week  | 1, 3, 5 days PO               | Pain (VAS scale)             | Mid-patellar effusion, Knee flexion, ROM | Postoperative pain levels and LOS similar in the two groups.                                                                | Not stated.                                                                                                                           |
| <i>Pope et al. (1997)</i>       | 1 week PO                             | Up to 1 year PO               | ROM                          | Blood loss, analgesia use                | Clinical disadvantages in the short term in CPM groups with no worthwhile improvement in the range of movement or function. | No benefits in any form received from a commercial party.                                                                             |
| <i>Sahin et al. (2006)</i>      | 1 week PO                             | 2 weeks, 6 weeks, 6 months PO | ROM, Pain (VAS scale)        | Swelling, KSS score                      | No significant differences found in VAS scores in CPM groups                                                                | Not stated.                                                                                                                           |
| <i>Walker et al. (1991)</i>     | From day 3 PO until discharge         | 1 month, 12 months.           | Manipulation, adverse events | ROM, pain (VAS scale), LOS               | CPM showed a significant reduction in analgesia consumption                                                                 | Supported by a grant from the National Institutes of Health, General Clinical Research Center Branch. Division of Research Resources. |
| <b>Preoperative exercise</b>    |                                       |                               |                              |                                          |                                                                                                                             |                                                                                                                                       |

|                                 |                                        |                                                                                                                         |                                   |                                                                                             |                                                                                                                                                                           |                                                                                                                                                                                     |
|---------------------------------|----------------------------------------|-------------------------------------------------------------------------------------------------------------------------|-----------------------------------|---------------------------------------------------------------------------------------------|---------------------------------------------------------------------------------------------------------------------------------------------------------------------------|-------------------------------------------------------------------------------------------------------------------------------------------------------------------------------------|
| <i>Calatayud et al. (2016)</i>  | 3 days/week for 8 weeks before surgery | 8 weeks before surgery (T1), after 8 weeks of training (T2), 1 month after TKA (T3) and finally 3 months after TKA (T4) | WOMAC functional and pain scale   | SF-36 scale, pain VAS scale, TUG                                                            | The present study supports the use of preoperative training in end-stage OA patients to improve early postoperative outcomes.                                             | The authors did not receive financial support for this study, and there are no known conflicts of interest associated with this publication that could have influenced its outcome. |
| <i>Gstoettner et al. (2011)</i> | 1 day/week for 6 weeks before surgery. | 6 weeks pre-operatively; 6 weeks PO                                                                                     | Balance, gait speed, and function | WOMAC pain and stiffness subscales, KSS scale                                               | There was a significant improvement in KSS, WOMAC pain and stiffness within both groups after TKA. No difference in clinical outcome was observed between the two groups. | Not stated.                                                                                                                                                                         |
| <i>McKay et al. (2012)</i>      | 3 days/week for 6 weeks before surgery | Baseline testing 6 weeks ( $\pm 3$ days) before surgery. Before TKA, at 6 and 12 weeks after TKA,                       | Isometric quadriceps strength.    | Mobility, pain, self-reported function, health-related quality of life, and arthritis self- | Reduction of pain within the groups, but there is not a direct comparison between them. Perceived functional ability shows an inverse relationship to pain,               | Not stated.                                                                                                                                                                         |

|                               |                                          |                                                                                                                                                                                                                         |            |                                                 |                                                                                                                               |             |
|-------------------------------|------------------------------------------|-------------------------------------------------------------------------------------------------------------------------------------------------------------------------------------------------------------------------|------------|-------------------------------------------------|-------------------------------------------------------------------------------------------------------------------------------|-------------|
|                               |                                          | participants completed the questionnaire battery and physical testing.                                                                                                                                                  |            | efficacy.                                       | but no information on significance.                                                                                           |             |
| <b>Cryotherapy</b>            |                                          |                                                                                                                                                                                                                         |            |                                                 |                                                                                                                               |             |
| <i>Albrecht et al. (2008)</i> | 2 days PO                                | 1 week PO                                                                                                                                                                                                               | VAS Scale  | Blood loss, ROM, Adverse effects                | Significant reduction in VAS for CT group                                                                                     | Not stated. |
| <i>Gibbons et al. (2001)</i>  | 6 hours/day throughout the hospital stay | Blood loss: during the procedure. Amount of morphine received: over the 48 h<br>The amount of oral analgesia: up to the 10-day stage. Pain scores recorded on alternate days after a period of physiotherapy at the end | Blood loss | ROM, pain scores, analgesia, LOS, complications | No difference was found between the 2 groups except for less blood loss in the surgical drains in the cold compression group. | Not stated. |

|                                 |             |                                                                      |            |                                                       |                                                                                                                                           |                                                             |
|---------------------------------|-------------|----------------------------------------------------------------------|------------|-------------------------------------------------------|-------------------------------------------------------------------------------------------------------------------------------------------|-------------------------------------------------------------|
|                                 |             | of the afternoon.<br>The range of movement:<br>10 days after TKA.    |            |                                                       |                                                                                                                                           |                                                             |
| <i>Ivey et al. (1994)</i>       | 72 hours PO | Number of attempts:<br>every hour PO<br>Amount of morphine:<br>daily | Pain       | Number of Patient-controlled analgesia (PCA) attempts | Different temperature did not show any significant differences in pain improvement after surgery, and in the amount of injected morphine. | Not stated.                                                 |
| <i>Kullenberg et al. (2006)</i> | 3 days PO   | Up to 3 weeks PO                                                     | ROM        | Pain, LOS, Hemoglobin loss                            | Cold compression therapy improves control of pain and might lead to improvement in ROM and reduce the length of hospital stay.            | No benefits or funds were received in support of the study. |
| <i>Levy et al. (1993)</i>       | 4 days PO   | Up to 2 weeks PO                                                     | Blood loss | Pain, ROM                                             | Significant lower blood loss and morphine consumption in the intervention group;<br>Significant                                           | Not stated.                                                 |

|                                |                                                                                    |                               |                       |                                  |                                                                                                                                                                           |             |
|--------------------------------|------------------------------------------------------------------------------------|-------------------------------|-----------------------|----------------------------------|---------------------------------------------------------------------------------------------------------------------------------------------------------------------------|-------------|
|                                |                                                                                    |                               |                       |                                  | improvement in ROM at 7 and 14 days from surgery.                                                                                                                         |             |
| <i>Morsi E. (2002)</i>         | 2 weeks PO                                                                         | Up to 6 weeks after discharge | Analgesic consumption | Pain score, ROM                  | Continuous-flow cold therapy is advantageous after TKA. It showed to provide better results in all the areas compared.                                                    | Not stated. |
| <i>Radkowski et al. (2007)</i> | Postsurgical period until discharge                                                | 2 weeks PO                    | Adverse events        | Pain, Analgesia, Blood loss, ROM | Postoperative narcotic consumption, postoperative drainage, self-reported knee function, and range of motion were not affected by the different cryotherapy temperatures. | Not stated. |
| <i>Smith et al. (2002)</i>     | Treatment 1 for 24 hours after surgery; treatment 2 for 6 hours; and then cryo-pad | Day 1-3 PO                    | Function, swelling    | Pain, Analgesia                  | Not significant differences in pain improvement                                                                                                                           | Not stated. |



|                                |                                                                                                                                                                 |                                             |                                               |                                                   |                                                                                                                         |                                                                                                              |
|--------------------------------|-----------------------------------------------------------------------------------------------------------------------------------------------------------------|---------------------------------------------|-----------------------------------------------|---------------------------------------------------|-------------------------------------------------------------------------------------------------------------------------|--------------------------------------------------------------------------------------------------------------|
| <i>Su et al. (2012)</i>        | Inpatient stay: 2 hours on plus 1 hour off for a minimum of 4 cycles per day. After discharge: 1 hour on plus 30 minutes off for a minimum of 4 cycles per day. | Pre-operative, 2 weeks, 6 weeks PO          | ROM and function                              | Pain (VAS scale) and morphine consumption         | No improvement in ROM and pain perception. Significant decrease in pain medication consumption and higher satisfaction. | Not stated.                                                                                                  |
| <i>Thienpont et al. (2014)</i> | Postsurgical period                                                                                                                                             | Day 2, 6 weeks PO                           | Pain (VAS scale), and analgesics consumption. | ROM, swelling, and blood loss.                    | Advanced cryotherapy with a continuous cooling for a prolonged period did not provide an earlier recovery.              | The authors report no conflict of interest. All conflict of interest forms are on file with the publication. |
| <i>Webb et al. (1998)</i>      | 48 hours PO                                                                                                                                                     | Pre-operative, 5 days, 6 weeks, 3 months PO | Blood loss                                    | Pain scores, pain medication consumption, and ROM | Cryo/cuff showed improvement in postoperative blood loss and pain but did not influence swelling and return to motion   | Not stated                                                                                                   |

|                                |                                                                                                 |                                               |                              |                                                                   |                                                                                                      |                                                                                                                                       |
|--------------------------------|-------------------------------------------------------------------------------------------------|-----------------------------------------------|------------------------------|-------------------------------------------------------------------|------------------------------------------------------------------------------------------------------|---------------------------------------------------------------------------------------------------------------------------------------|
| <i>Walker et al. (1991)</i>    | From day 3 PO until discharge                                                                   | Discharge, 3 months                           | Manipulation, adverse events | ROM, pain (VAS scale), LOS                                        | Cryotherapy showed a significant reduction in analgesia request.                                     | Supported by a grant from the National Institutes of Health, General Clinical Research Center Branch. Division of Research Resources. |
| <b>Electrotherapy</b>          |                                                                                                 |                                               |                              |                                                                   |                                                                                                      |                                                                                                                                       |
| <i>Adravanti et al. (2013)</i> | 2 months PO                                                                                     | 1 month, 2 months, 6 months, 3 years PO       | Pain (VAS scale)             | KSS function score, SF36 score, Knee swelling                     | PEMFs showed significant differences in pain improvement and in functional scores in all timepoints. | One of the authors is employee of the device manufacturer.                                                                            |
| <i>Borckardt et al. (2013)</i> | 80 minutes/day in postoperative period                                                          | 48 hours PO                                   | Opioid Consumption           | Pain (BPI and VAS scales)                                         | TENS may be able to reduce post-TKA opioid requirements.                                             | Not stated.                                                                                                                           |
| <i>Moretti et al. (2012)</i>   | Treatment began within seven days from TKA, and consisted of 4-hour sessions/day for 60 days PO | Pre-operatively, and at 1, 2, 6, 12 months PO | Pain (VAS scale)             | Knee Society Score; SF-36; Joint swelling score; Functional score | PEMFs showed significant differences in pain improvement and in functional scores in all timepoints. | Two of the authors are employees of the device manufacturer.                                                                          |
| <i>Walker et al. (1991)</i>    | From day 3 PO until discharge                                                                   | 3 day PO, discharge                           | Manipulation, adverse events | ROM, pain (VAS scale), LOS                                        | TENS did not show a significant difference in analgesia consumption.                                 | Supported by a grant from the National Institutes of Health, General Clinical Research Center Branch. Division of Research            |

---

Resources.

---

**Acupuncture**

|                                |                                            |                                  |                                                         |                                               |                                                                                                                            |                                                            |
|--------------------------------|--------------------------------------------|----------------------------------|---------------------------------------------------------|-----------------------------------------------|----------------------------------------------------------------------------------------------------------------------------|------------------------------------------------------------|
| <i>Chen et al. (2015)</i>      | 20 minutes/day in the postoperative period | 2, 4, 8, 12, 24, 36, 48 hours PO | Opioid consumption                                      | Time to the first PCA request; pain intensity | Acupuncture showed significant pain improvement and opioid consumption.                                                    | The authors declare that they have no competing interests. |
| <i>Mikashima et al. (2012)</i> | 3 times/week from day 7 until day 21 PO    | 6, 14, 21 days PO                | VAS pain score                                          | Swelling; time to achieve preoperative ROM    | Acupuncture showed significant improvement in pain, reduction of swelling around the knee and early recovery of ROM.       | Not stated.                                                |
| <i>Tsang et al. (2007)</i>     | Postsurgical period                        | 4-8, 11-15 days PO               | Pain at rest and at maximum after exercise (VAS scale). | ROM, TUG.                                     | Acupuncture did not show significant improvement in pain, reduction of swelling around the knee and early recovery of ROM. | The authors declare that they have no competing interests. |

---

|                            |             |             |                            |     |                                                                                                  |                                                                                                                                                                                                                                                                                |
|----------------------------|-------------|-------------|----------------------------|-----|--------------------------------------------------------------------------------------------------|--------------------------------------------------------------------------------------------------------------------------------------------------------------------------------------------------------------------------------------------------------------------------------|
| <i>Tzeng et al. (2015)</i> | 48 hours PO | 48 hours PO | Time for first PCA request | N/A | Acupuncture showed significant longer time to the first demand for Patient-controlled Analgesia. | Supported by China Medical University under the Aim for Top University Plan of the Ministry of Education, Taiwan and by the Taiwan Ministry of Health and Welfare Clinical Trial and Research Center of Excellence. The authors declare that they have no competing interests. |
|----------------------------|-------------|-------------|----------------------------|-----|--------------------------------------------------------------------------------------------------|--------------------------------------------------------------------------------------------------------------------------------------------------------------------------------------------------------------------------------------------------------------------------------|

---

**eFigure 1.** PRISMA Flowchart Depicting the Search Strategy.

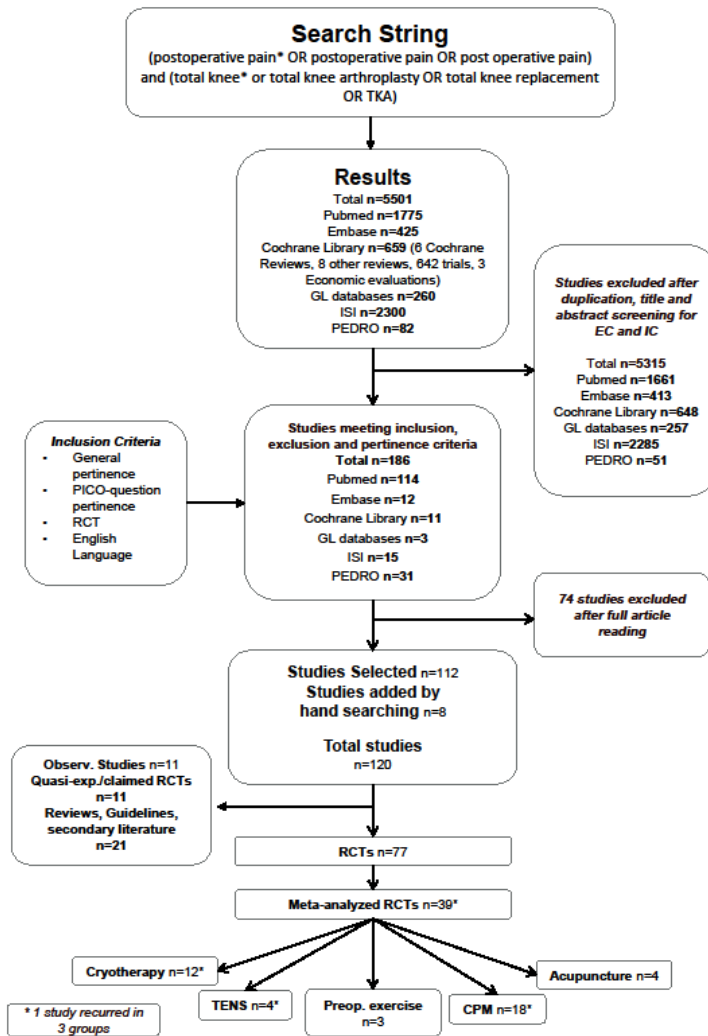

**eFigure 2. Pain relief: Cryotherapy**

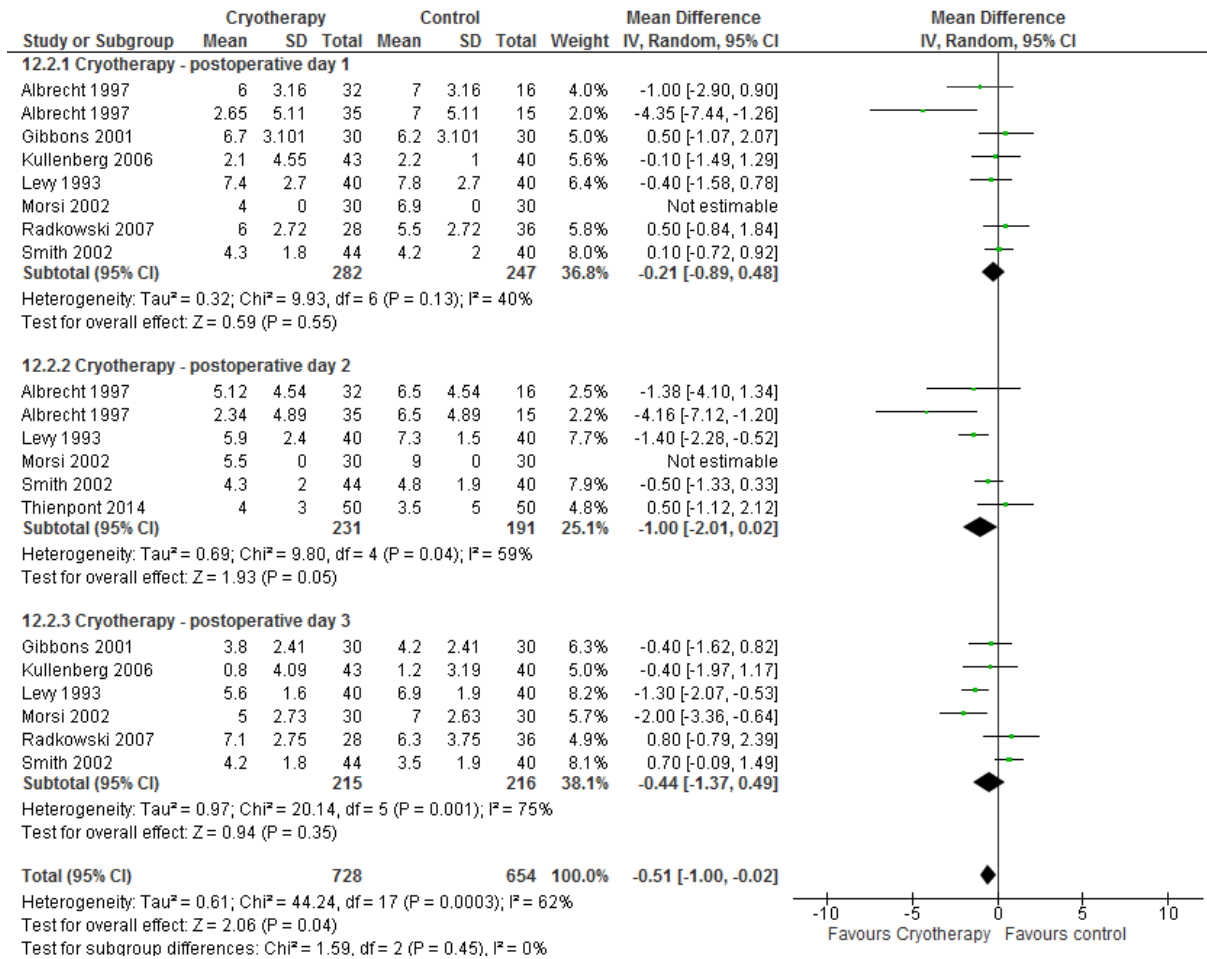

**eFigure 3. Pain relief: Continuous Passive Motion (CPM)**

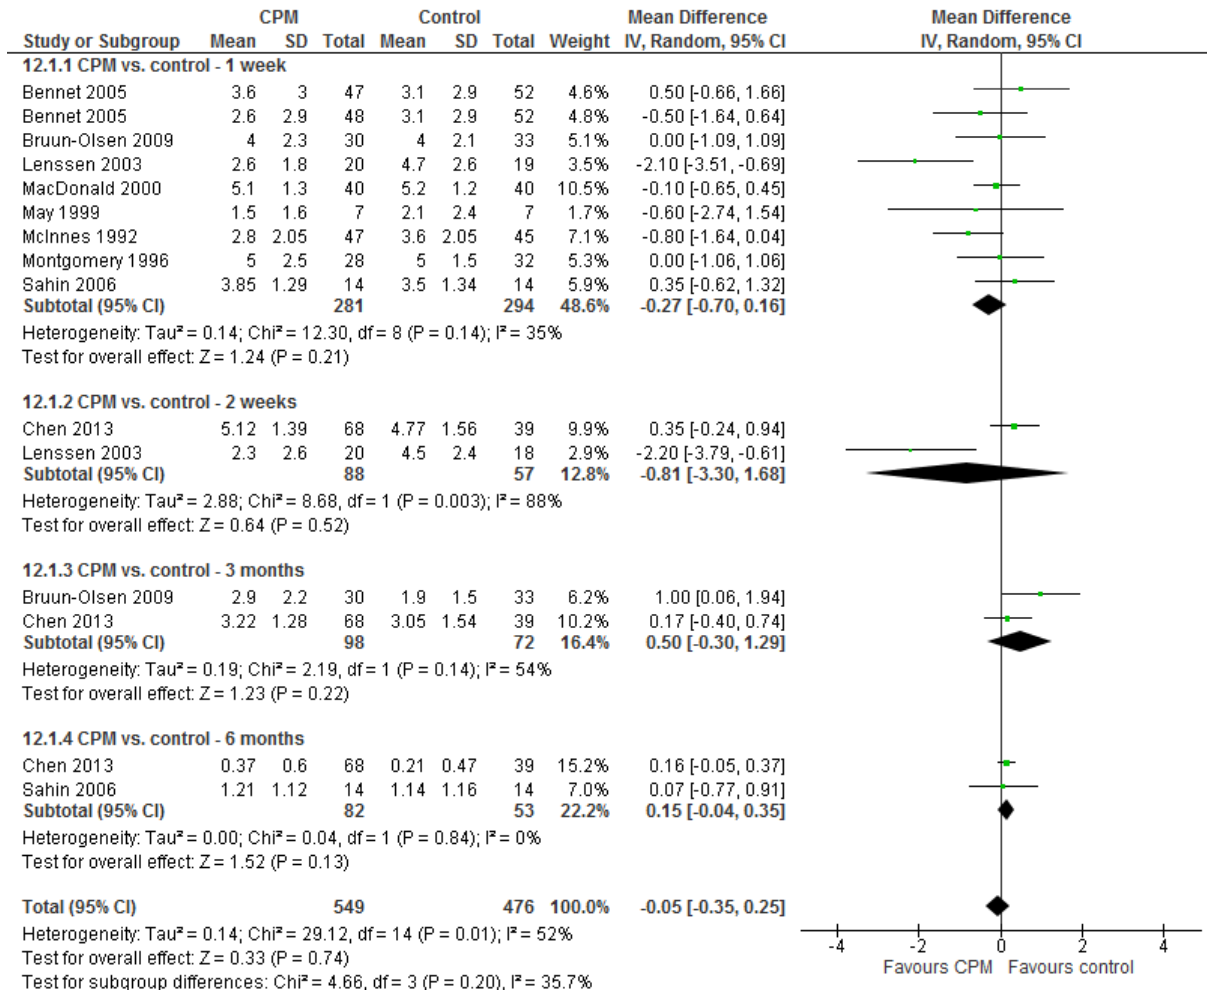

**eFigure 4. Pain relief: Continuous Passive Motion (CPM)**

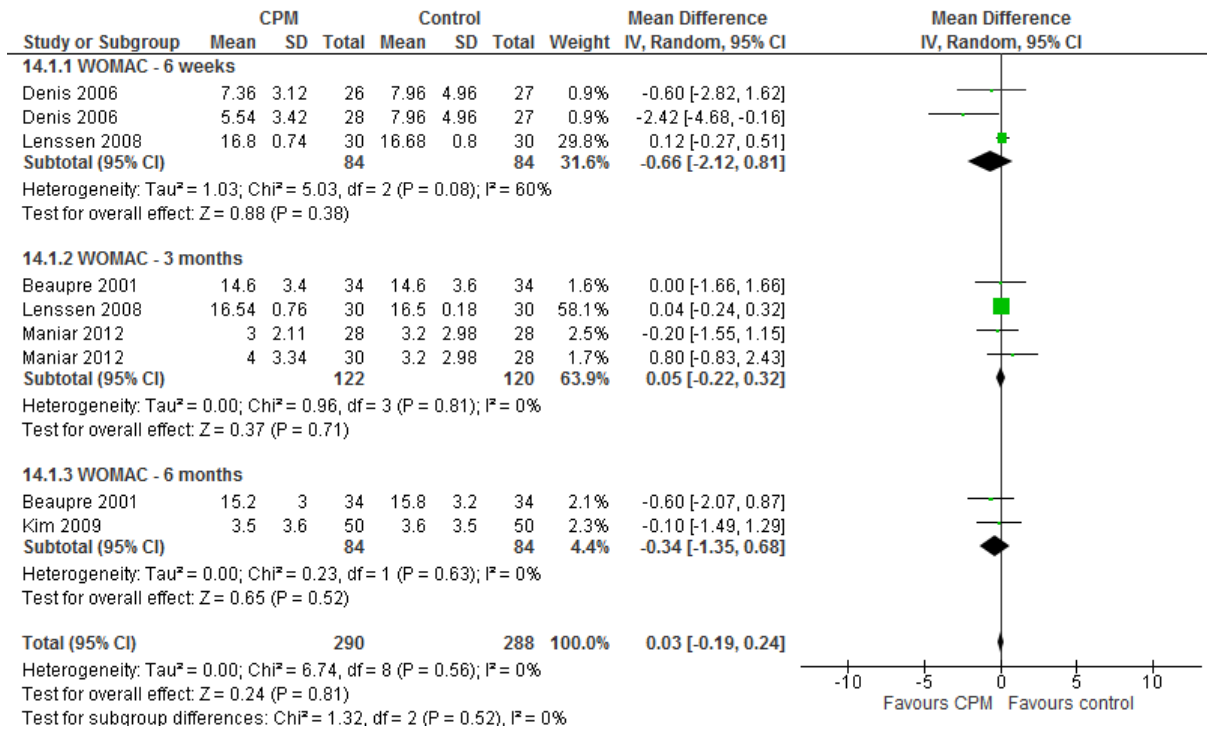



**eFigure 5. Pain relief: Preoperative Exercise**

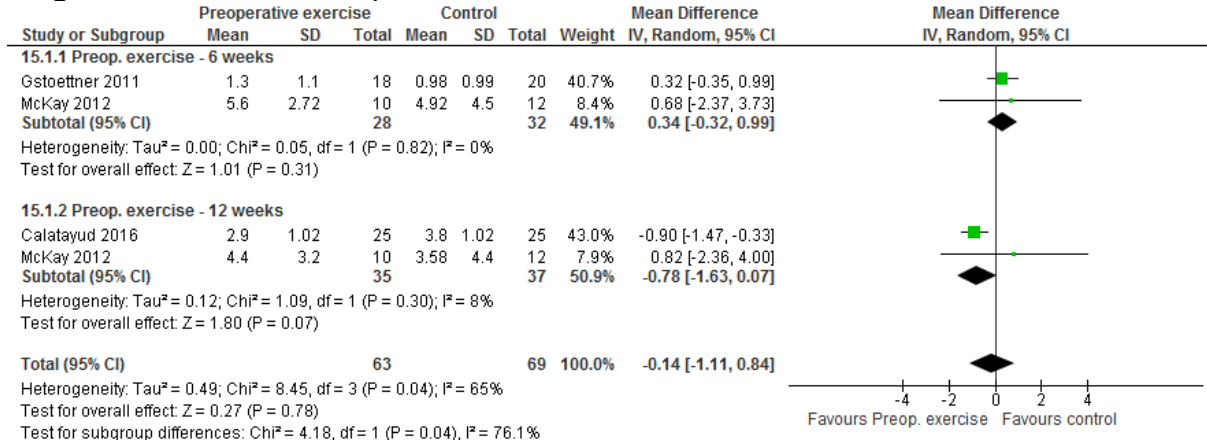

**eFigure 6. NSAID Consumption: Cryotherapy**

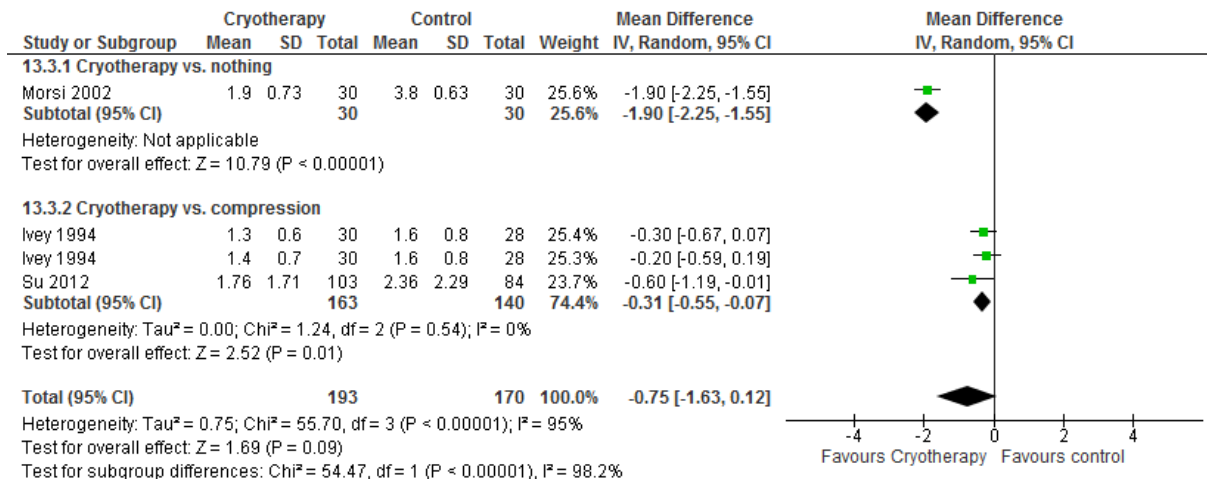

**eFigure 7. Opioid consumption: Acupuncture**

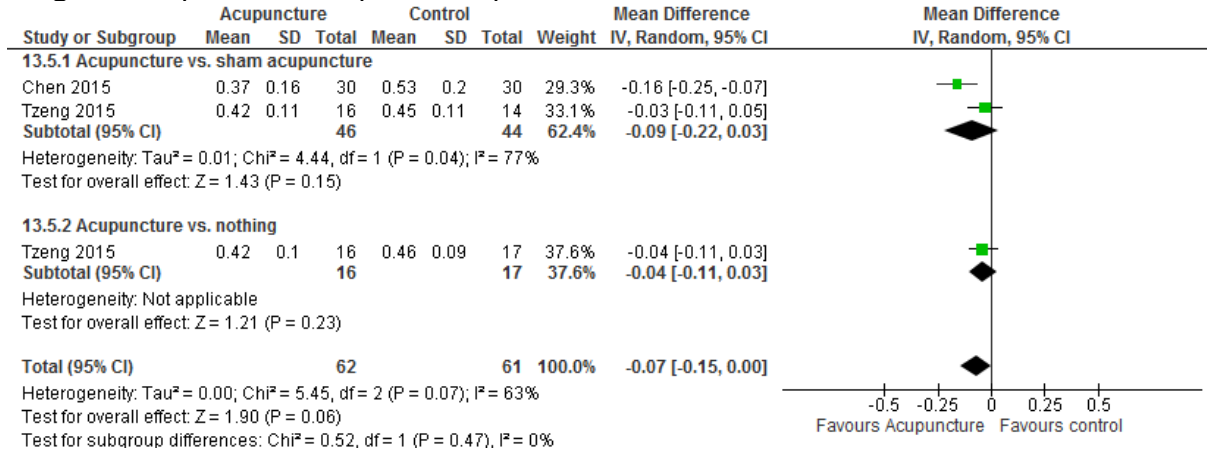

**eFigure 8. Opioid consumption: Continuous Passive Motion (CPM)**

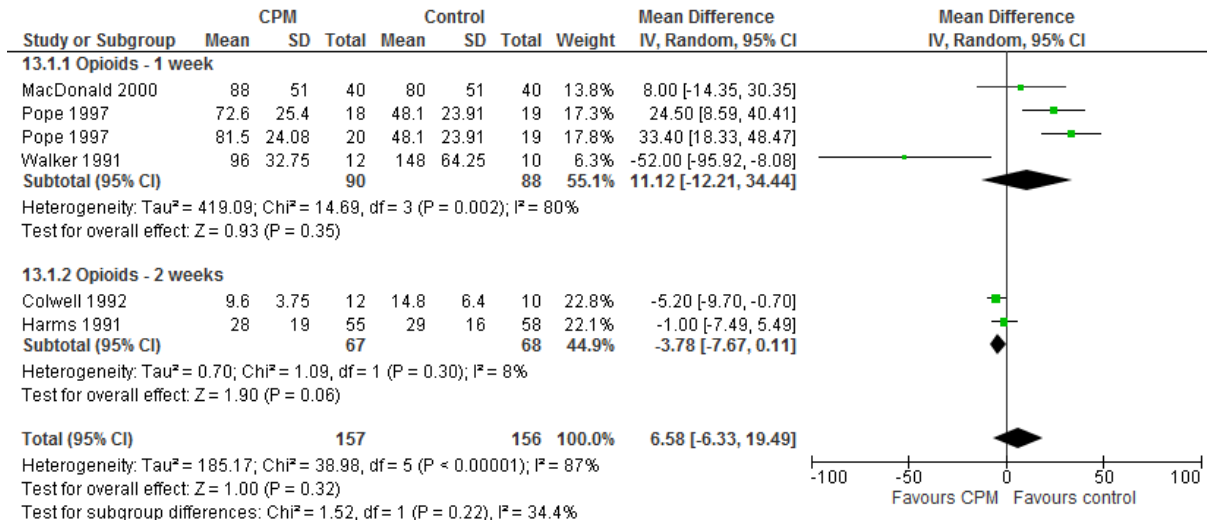

**eFigure 9. Acupuncture**

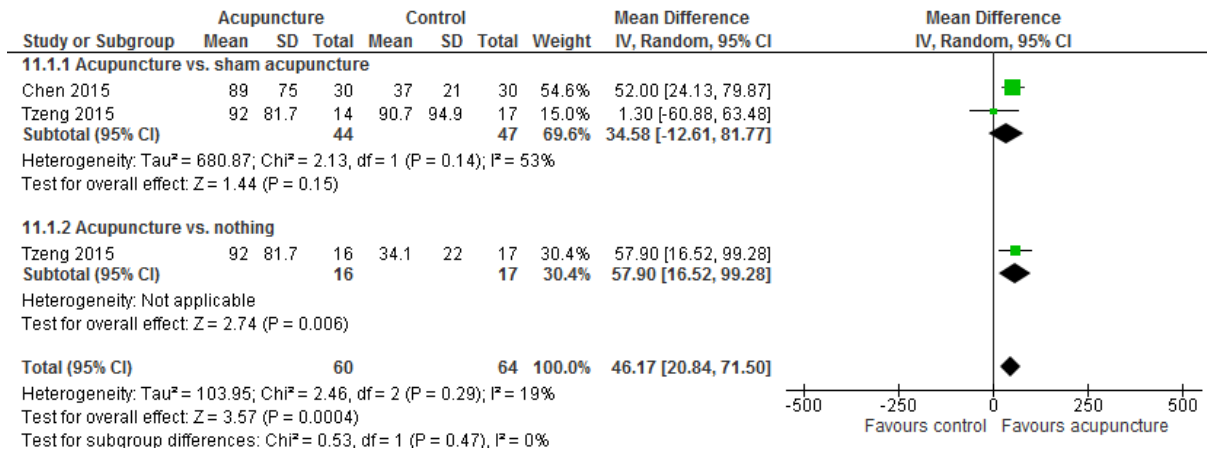

**eFigure 10:** Subgroup Sensitivity Analysis Comparing Studies Based on Allocation Concealment and Random Sequence Generation

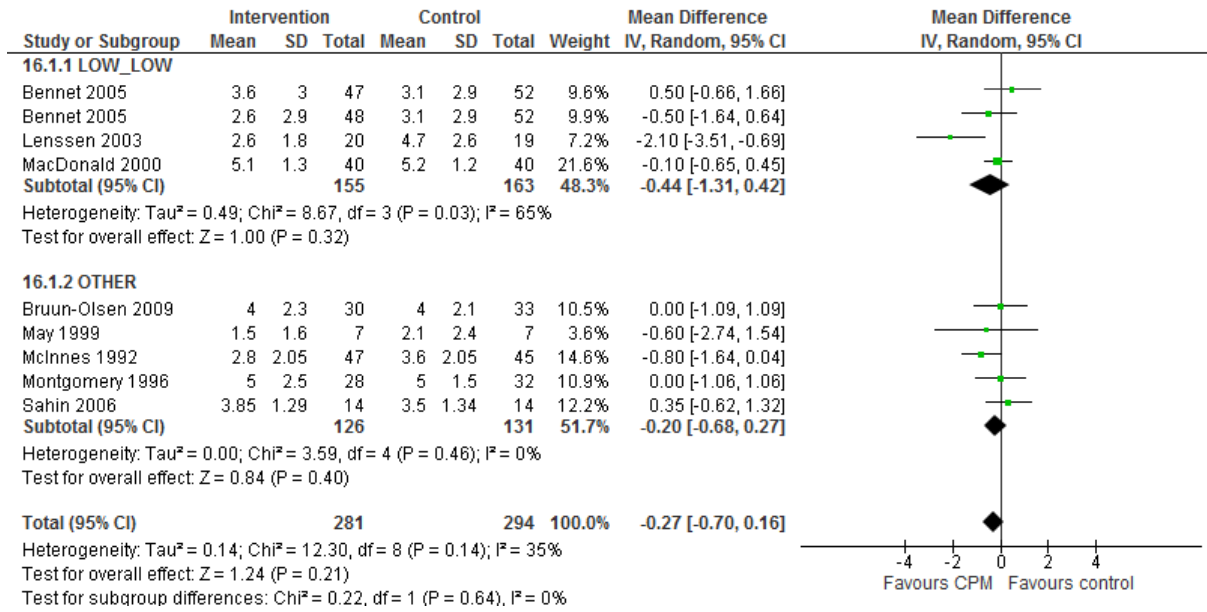

**eFigure 11: Subgroup Sensitivity Analysis Comparing Studies Based on Allocation Concealment and Random Sequence Generation**

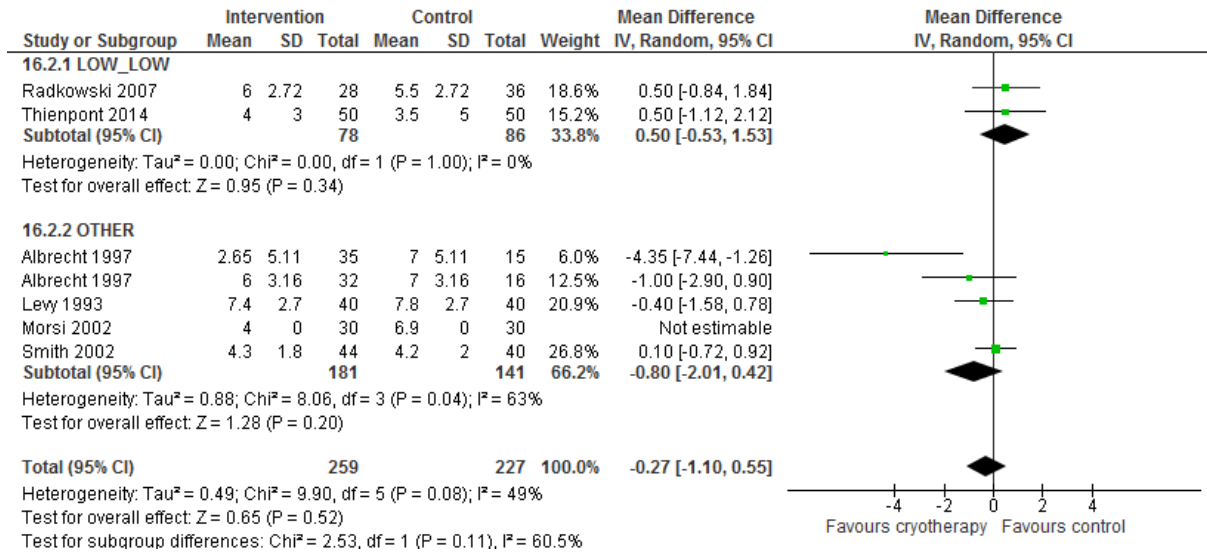

**eFigure 12:** Subgroup Sensitivity Analysis Comparing Studies Based on Allocation Concealment and Random Sequence Generation

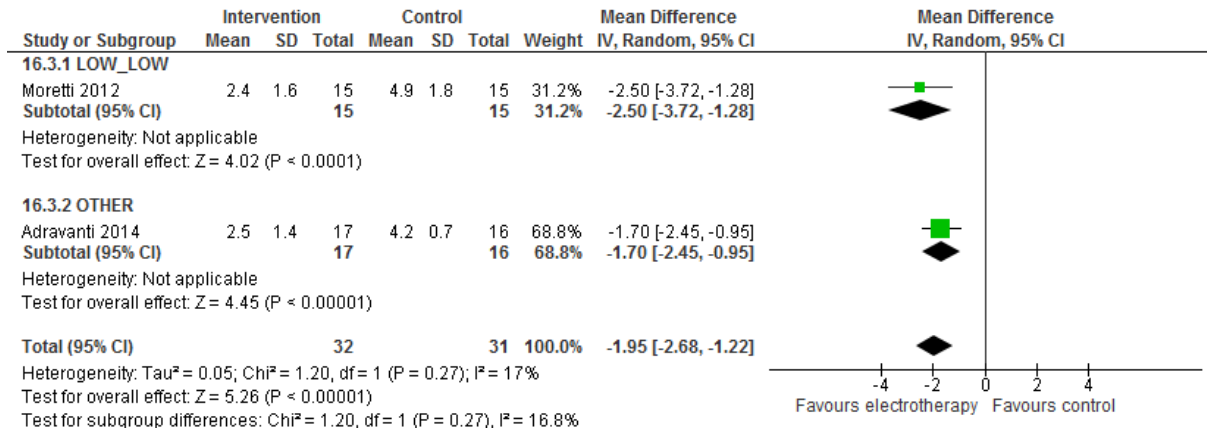



**eFigure 13:** Subgroup Sensitivity Analysis Comparing Studies Based on Allocation Concealment and Random Sequence Generation

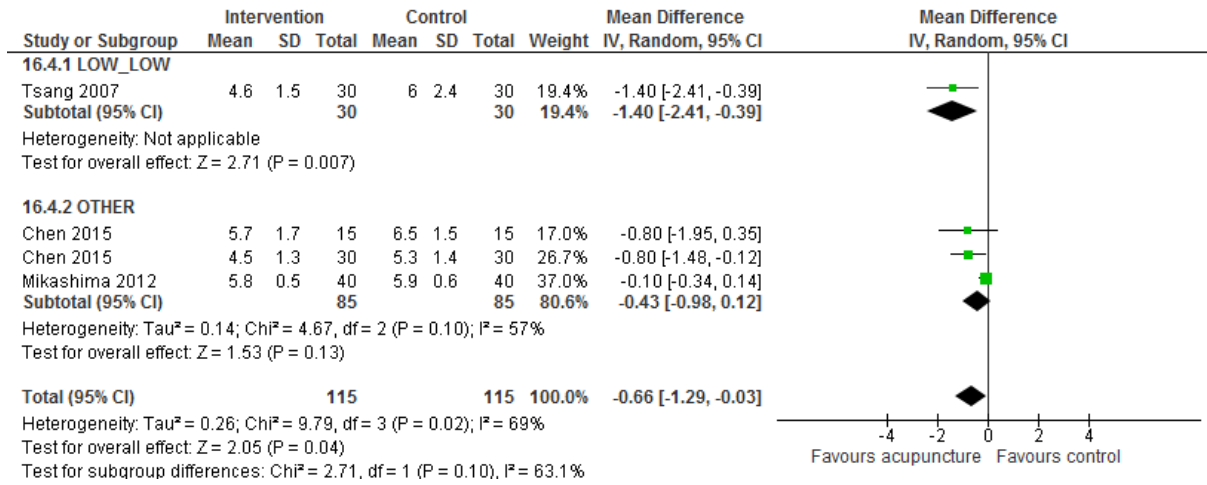

**eFigure 14:** Subgroup Sensitivity Analysis Comparing Studies Based on Allocation Concealment and Random Sequence Generation

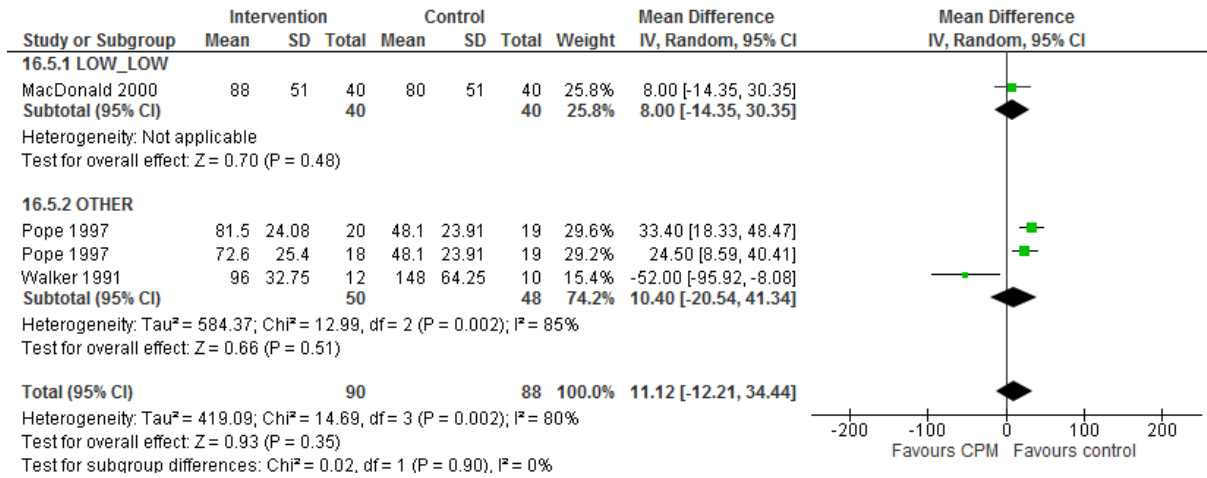

**eFigure 15: Subgroup Sensitivity Analysis Comparing Studies Based on Allocation Concealment and Random Sequence Generation**

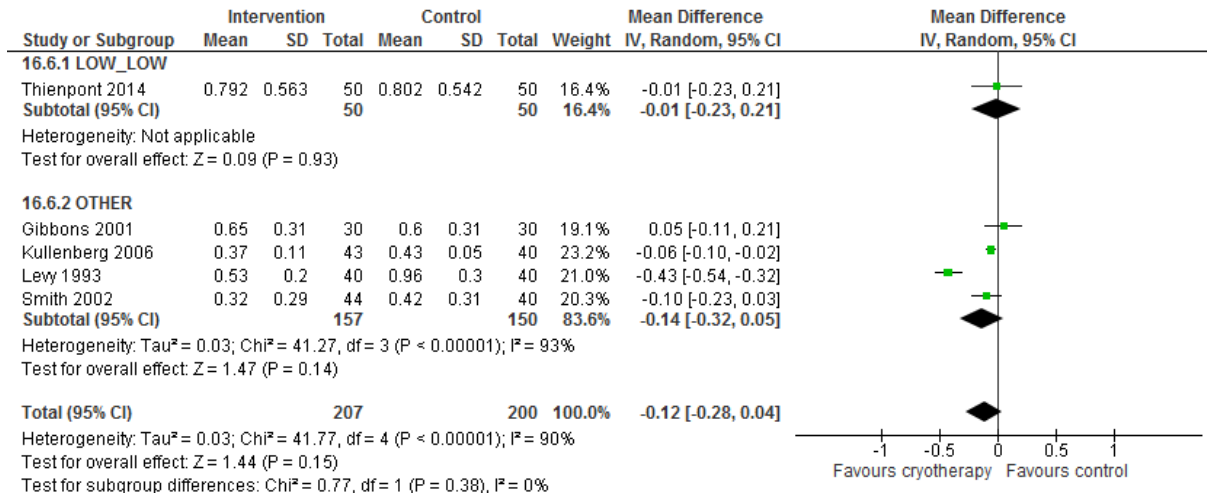

**eFigure 16:** Subgroup Sensitivity Analysis Comparing Studies Based on Allocation Concealment and Random Sequence Generation

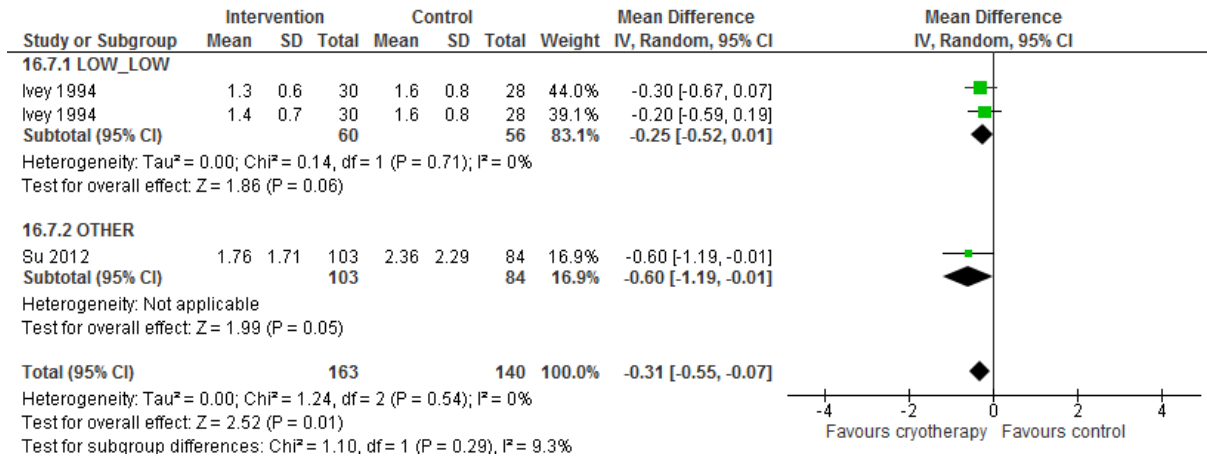

**eFigure 17: Subgroup Sensitivity Analysis Comparing Studies Based on Allocation Concealment and Random Sequence Generation**

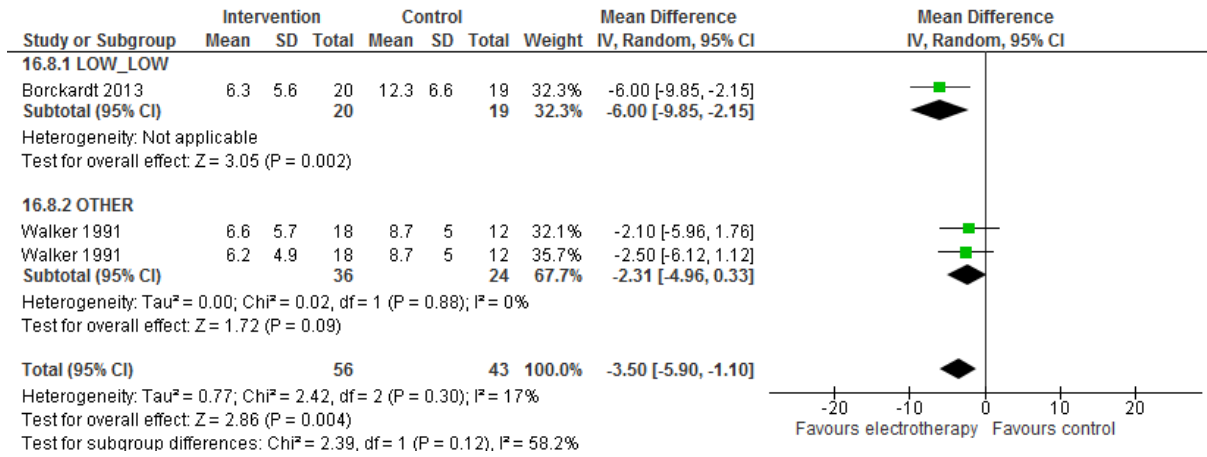

**eFigure 18:** Subgroup Sensitivity Analysis Comparing Studies Based on Allocation Concealment and Random Sequence Generation

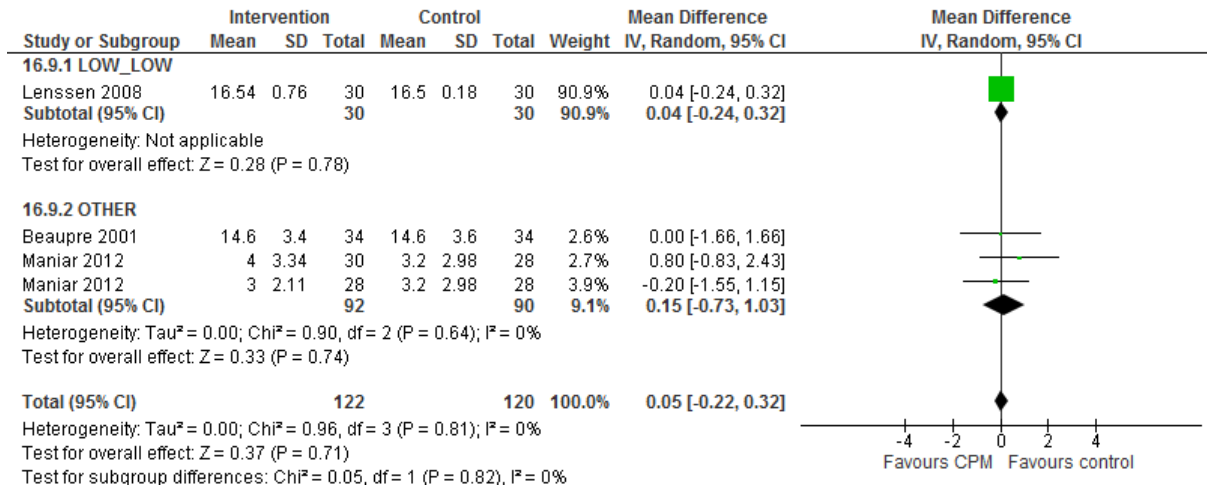

**eFigure 19:** Subgroup Sensitivity Analysis Comparing Studies Based on Allocation Concealment and Random Sequence Generation

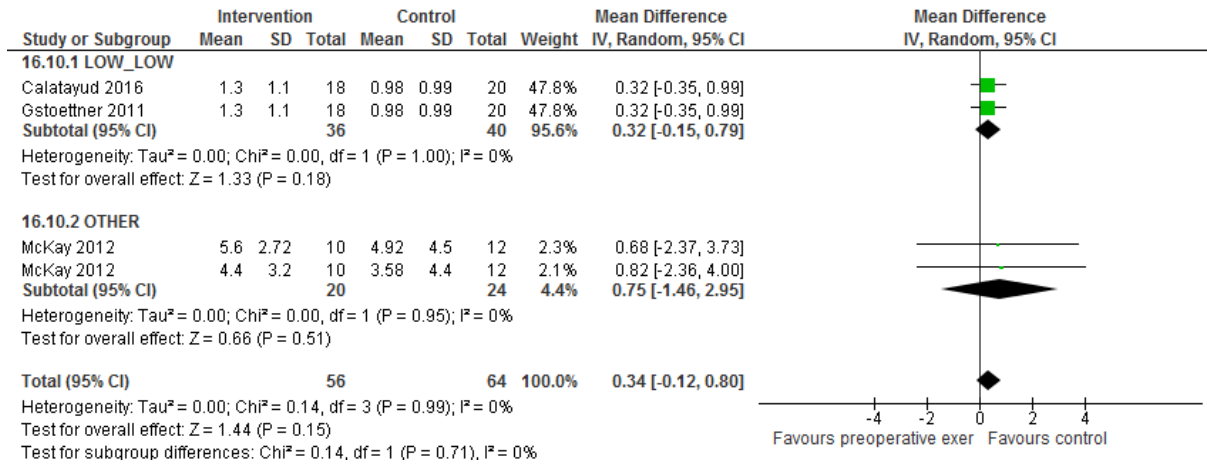

**eFigure 20: Subgroup Sensitivity Analysis Comparing Studies Based on How Pain Outcome Was Considered (Either Primary or Secondary)**

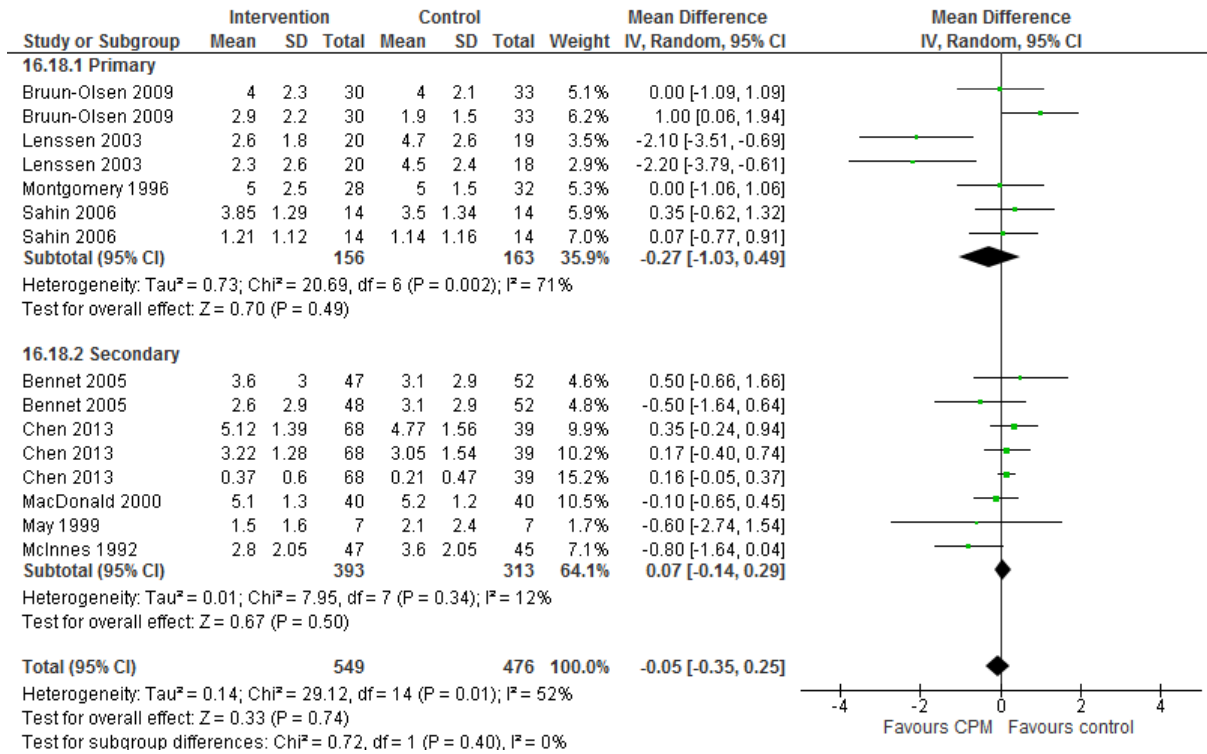



**eFigure 21: Subgroup Sensitivity Analysis Comparing Studies Based on How Pain Outcome Was Considered (Either Primary or Secondary)**

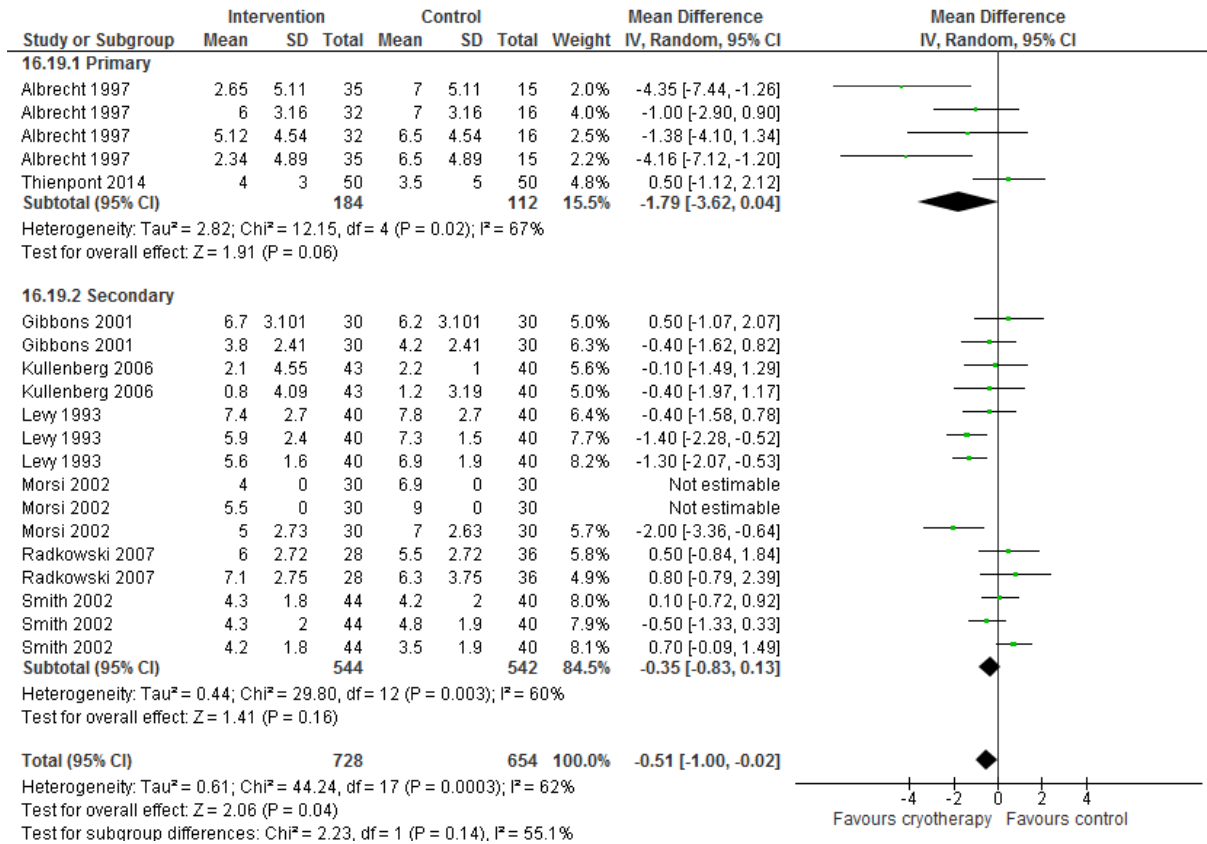

**eFigure 22:** Subgroup Sensitivity Analysis Comparing Studies Based on How Pain Outcome Was Considered (Either Primary or Secondary)

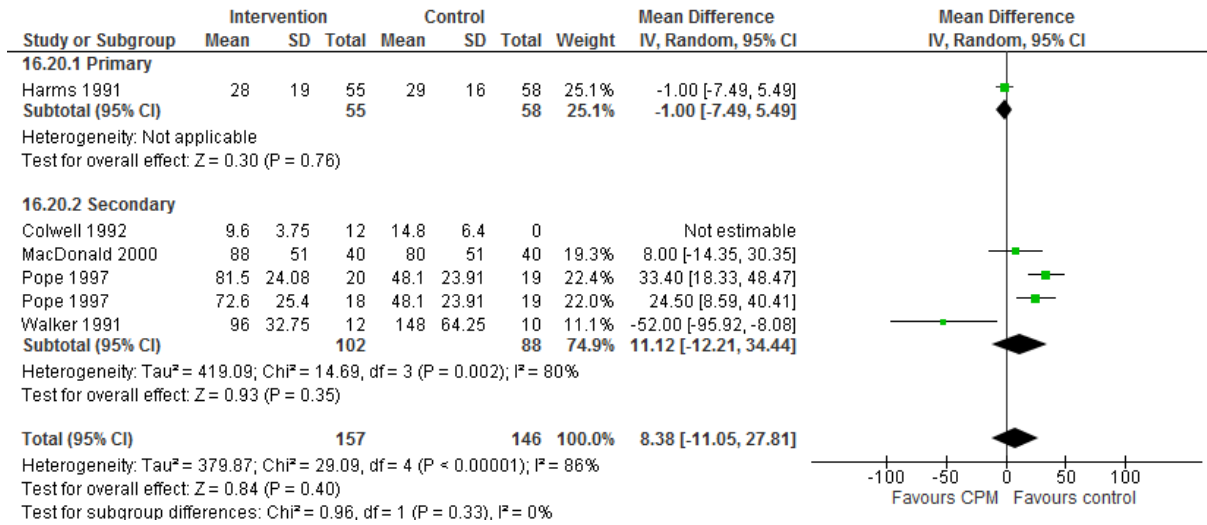

**eFigure 23:** Subgroup Sensitivity Analysis Comparing Studies Based on How Pain Outcome Was Considered (Either Primary or Secondary)

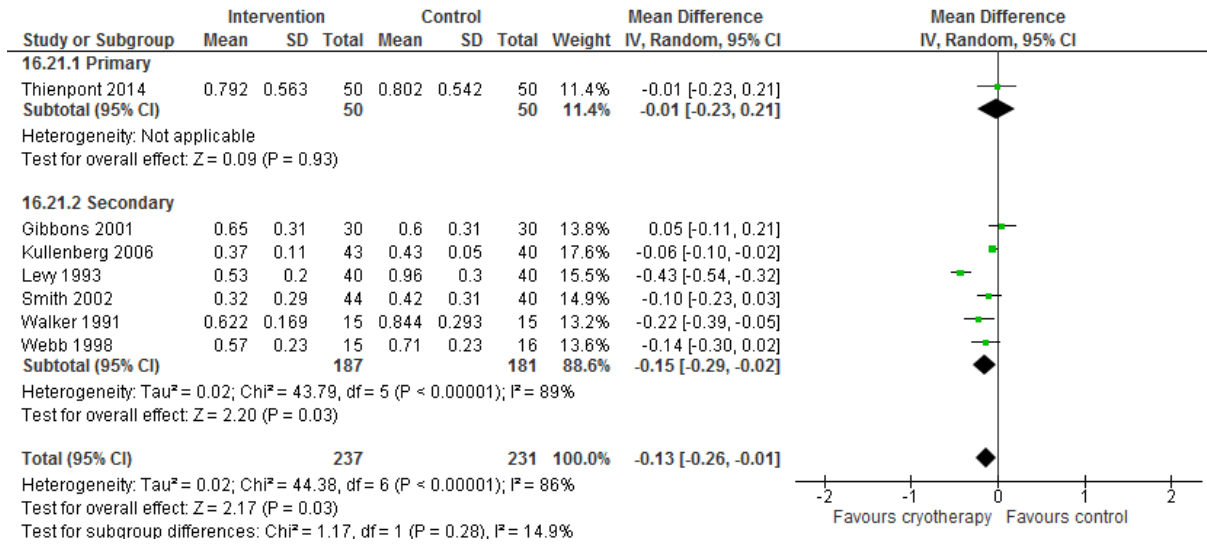

**eFigure 24:** Funnel Plot of Comparison for CPM Trials Measured in Terms of Reported Points in the VAS Scale at 1 Week

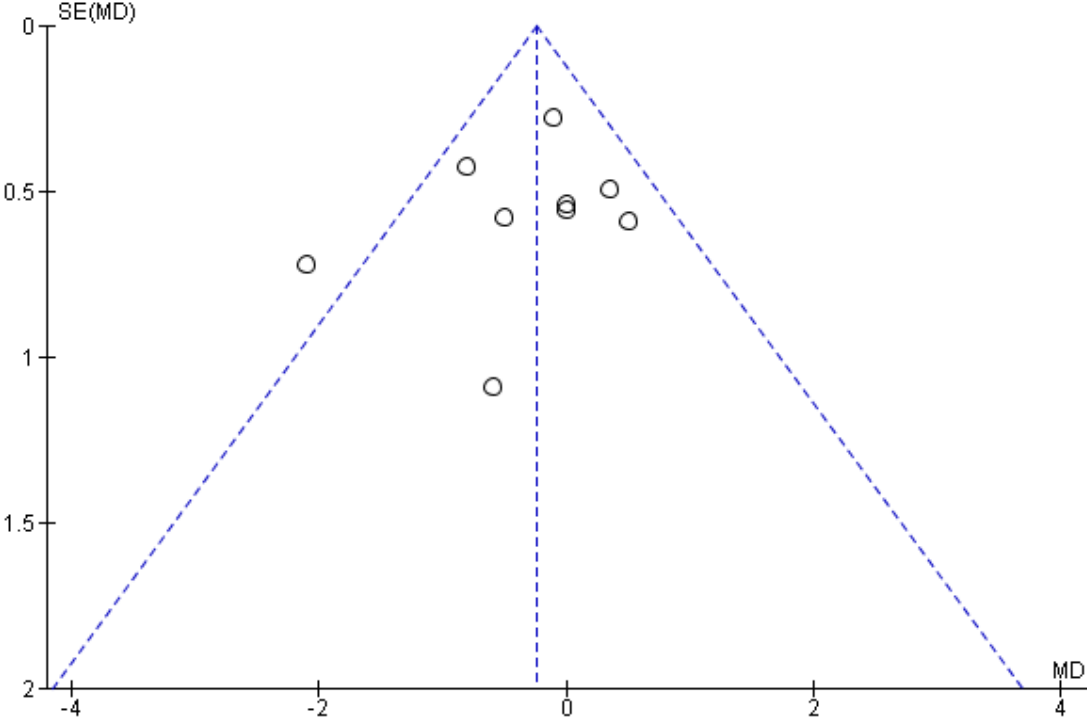

**eFigure 25:** Funnel Plot of Comparison for CPM Trials Measured in Terms of Opioid Consumption (mg/kg/48 Hours of Morphine Equivalent)

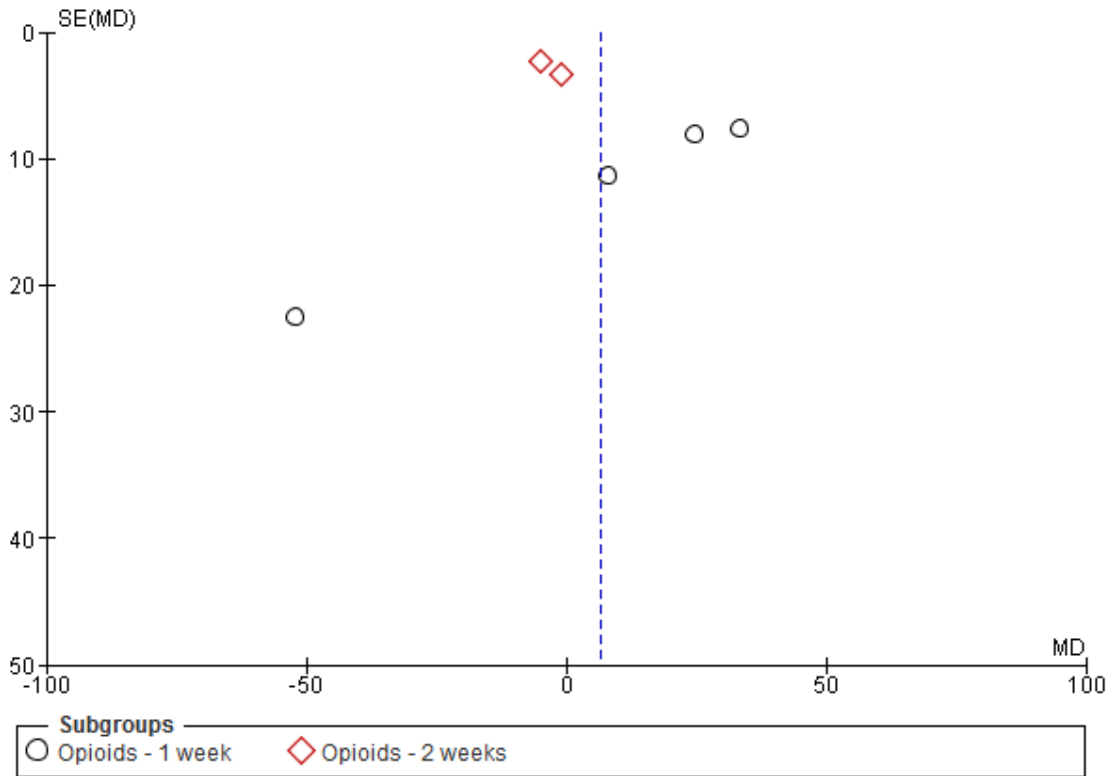

**eFigure 26:** Funnel Plot of Comparison for Cryotherapy Trials Measured in Terms of Reported Points in the VAS Scale

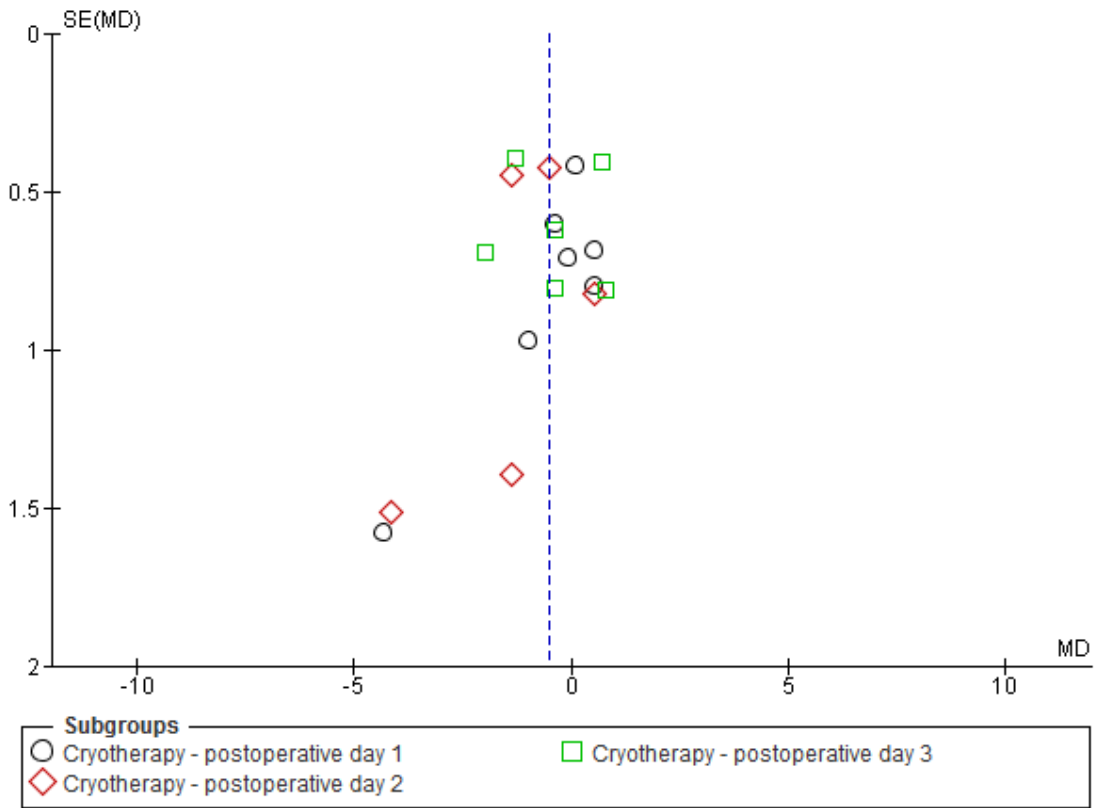

**eFigure 27:** Funnel Plot of Comparison for Cryotherapy Trials Measured in Terms of Opioid Consumption (mg/kg/48 Hours of Morphine Equivalent)

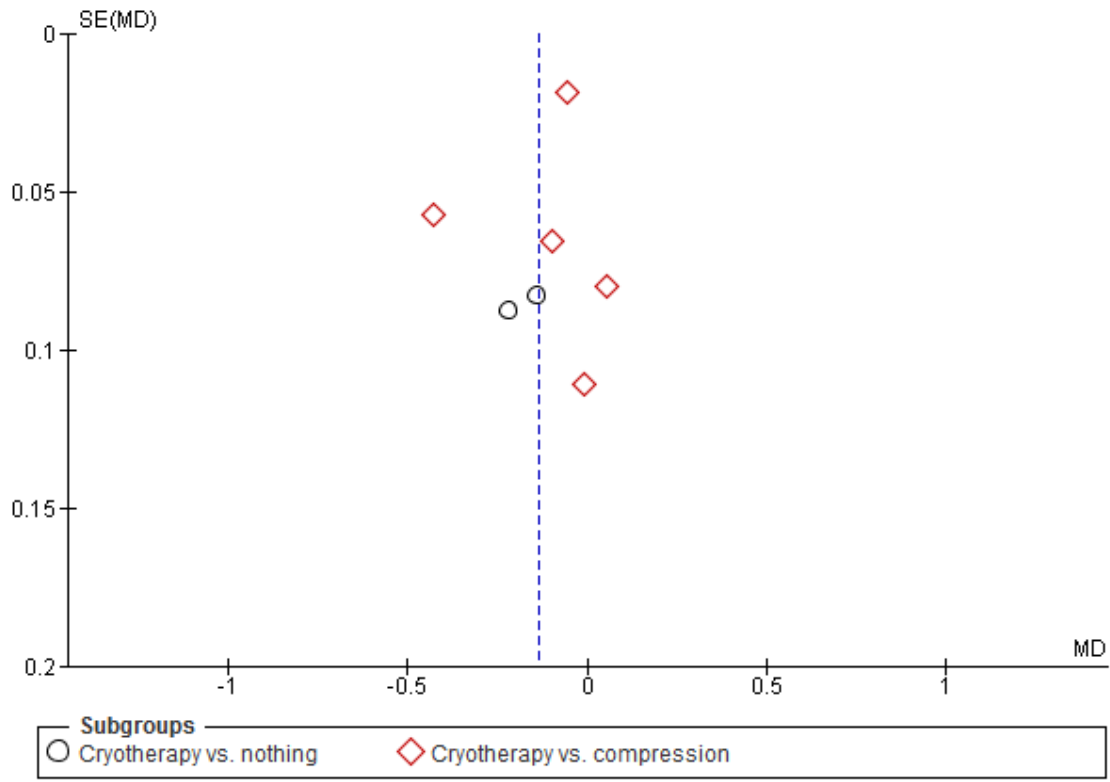

**eFigure 28:** Funnel Plot of Comparison for Electrotherapy Trials Measured in Terms of Reported Points in the VAS Scale at 1 Week

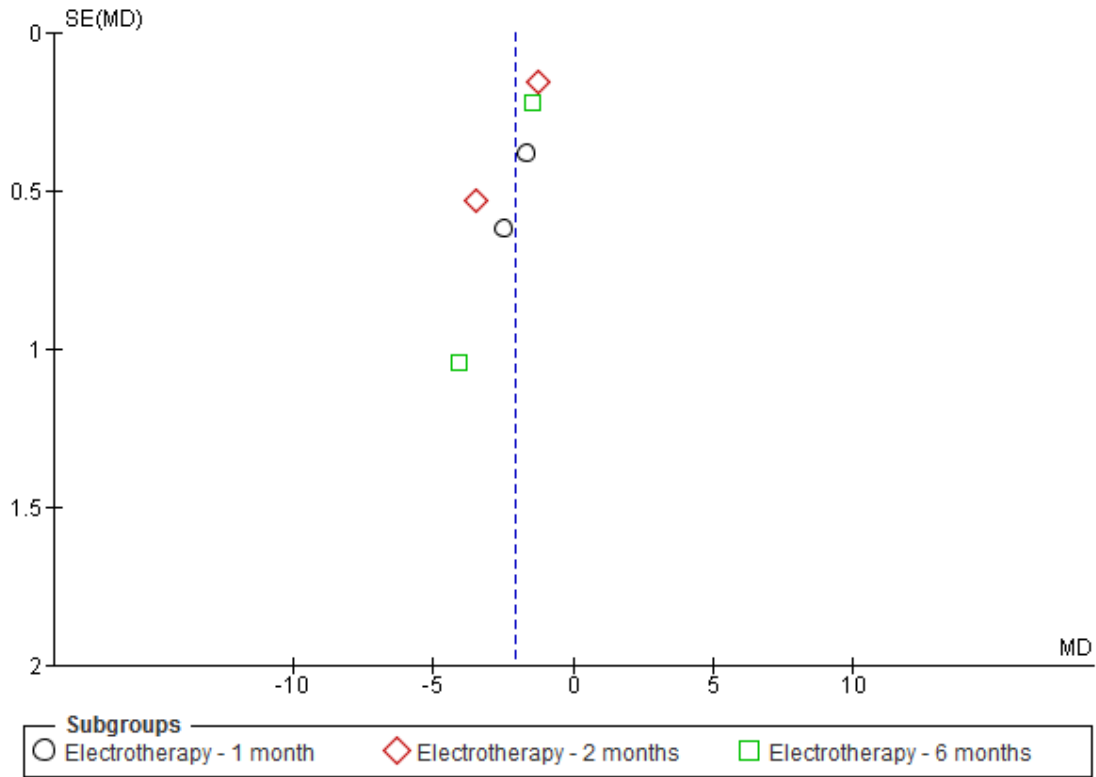



**eFigure 29:** Funnel Plot of Comparison For Acupuncture Trials Measured in Terms of Reported Points in the VAS Scale at 1 Week

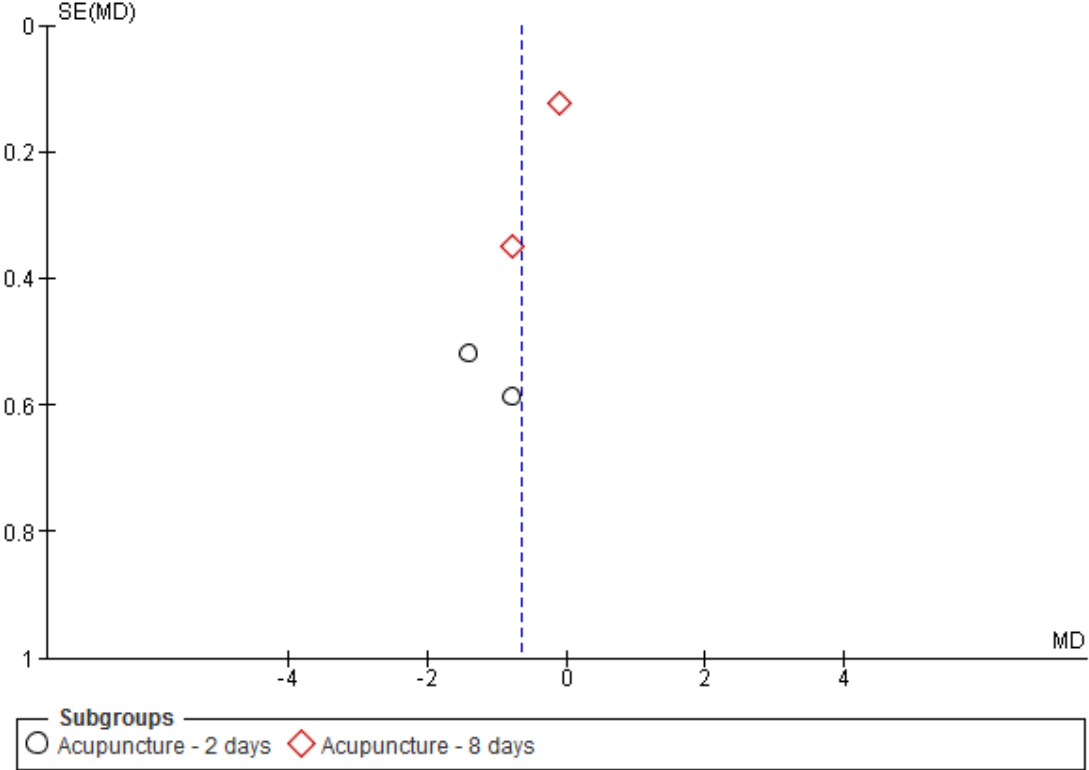

**eFigure 30: Subgroup Sensitivity Analysis Comparing Studies by Type of Control.**

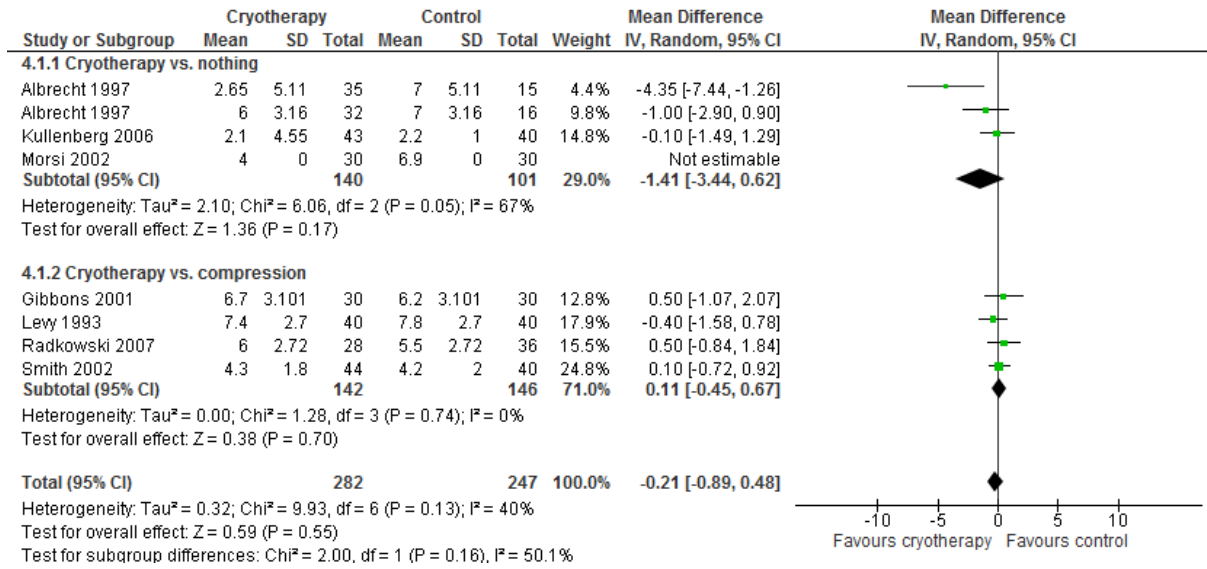

**eFigure 31: Subgroup Sensitivity Analysis Comparing Studies by Type of Control**

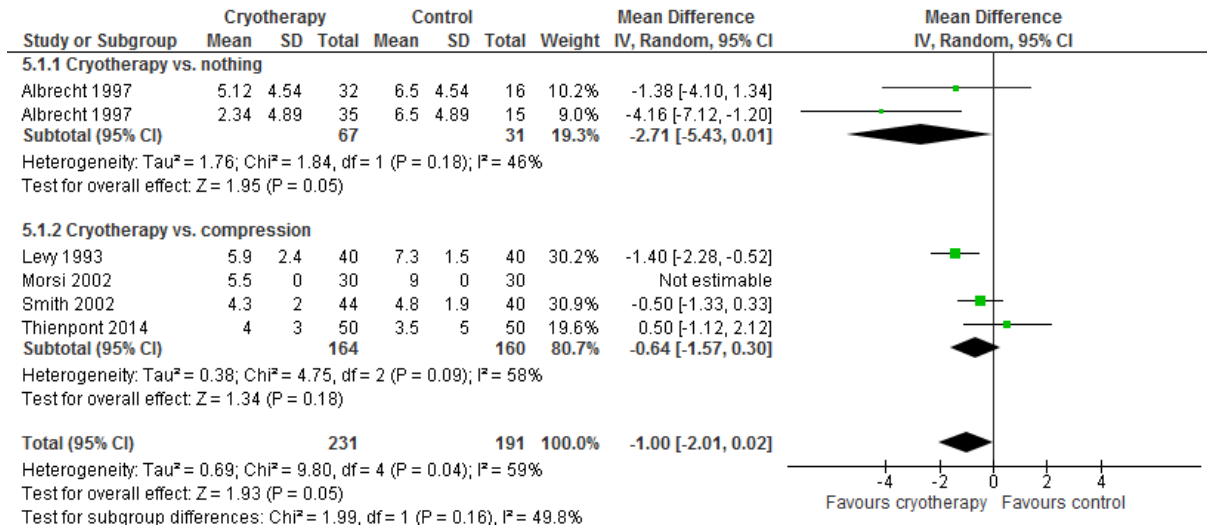

**eFigure 32: Subgroup Sensitivity Analysis Comparing Studies by Type of Control**

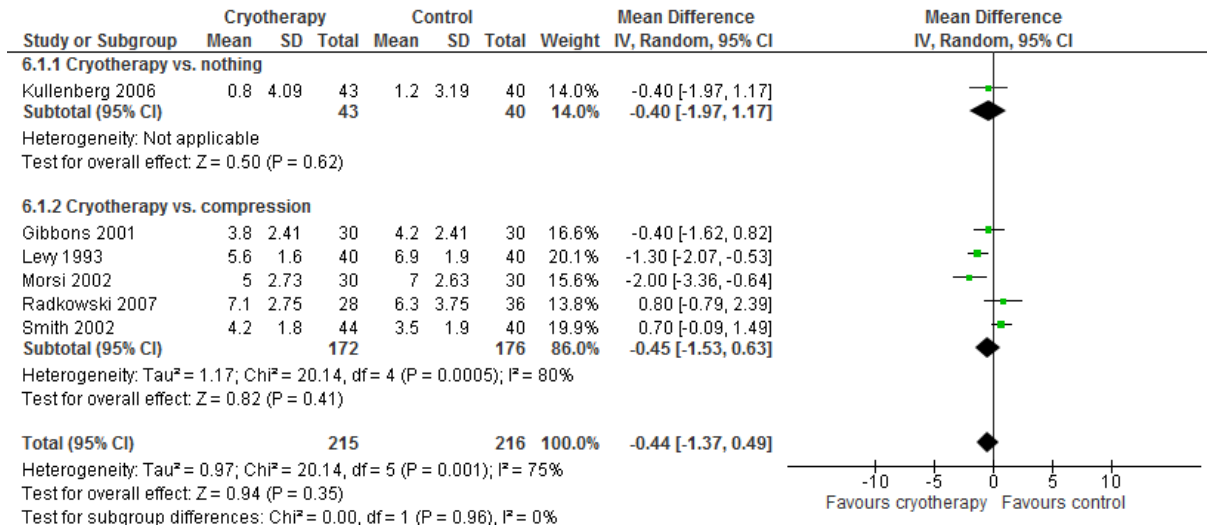

**eFigure 33: Subgroup Sensitivity Analysis Comparing Studies by Type of Control**

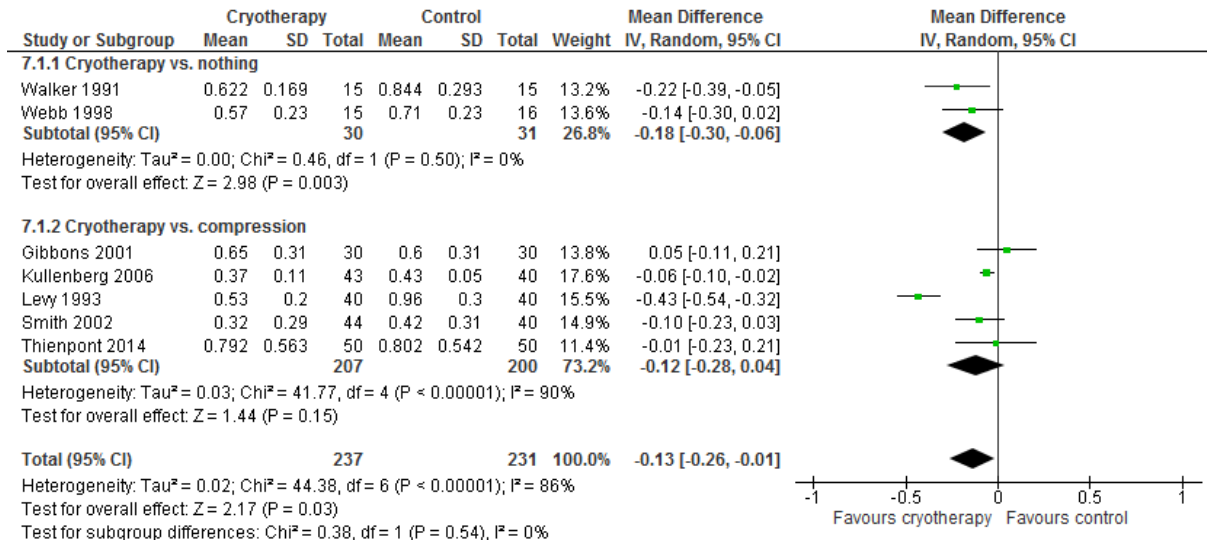

**eFigure 34: Subgroup Sensitivity Analysis Comparing Studies by Type of Control**

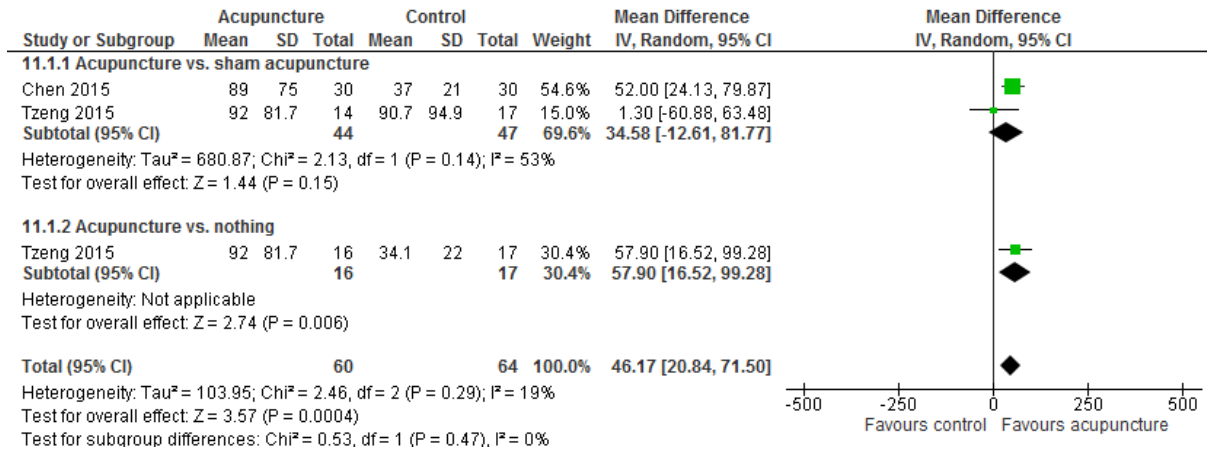

**eFigure 35: Subgroup Sensitivity Analysis Comparing Studies by Type of Control**

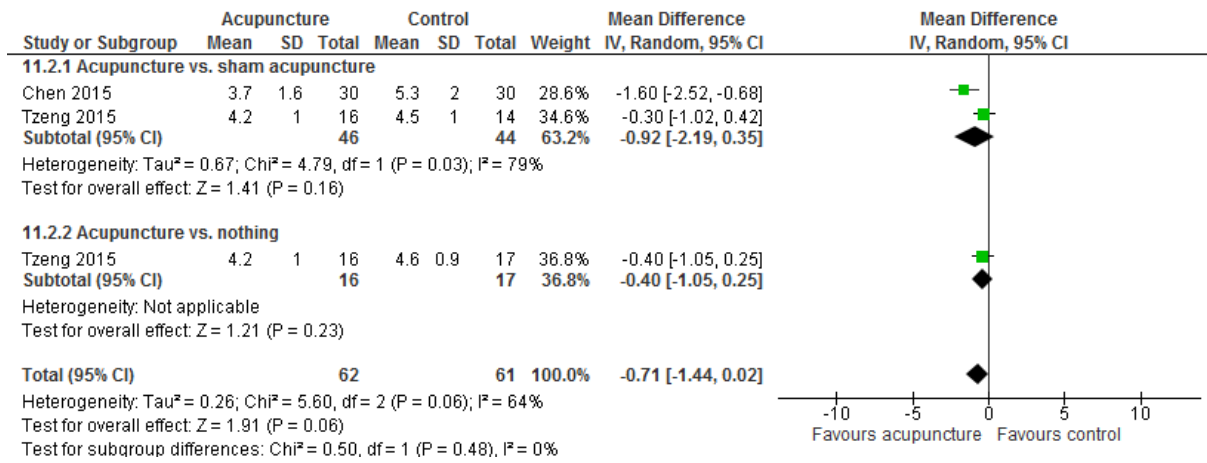

**eFigure 36: Subgroup Sensitivity Analysis Comparing Studies by Type of Control**

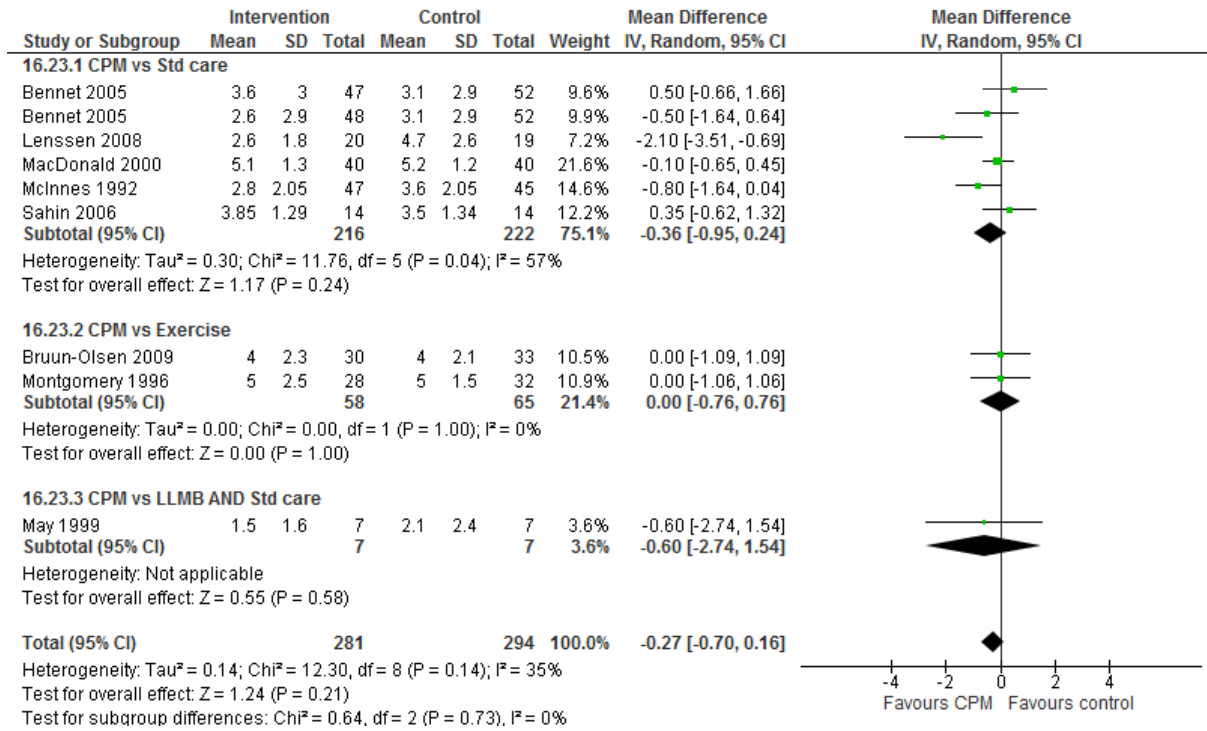



**eFigure 37: Subgroup Sensitivity Analysis Comparing Studies by Type of Control**

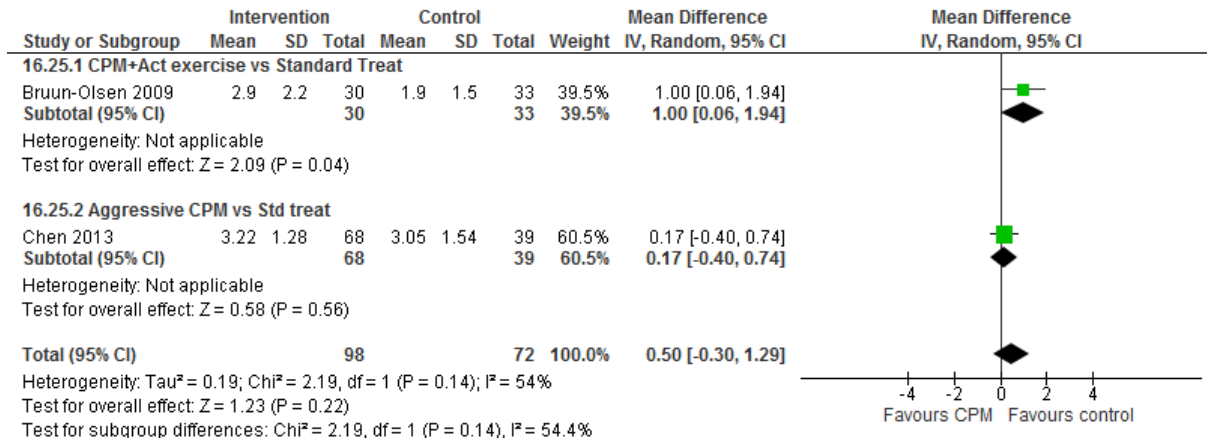

**eFigure 38: Subgroup Sensitivity Analysis Comparing Studies by Type of Control**

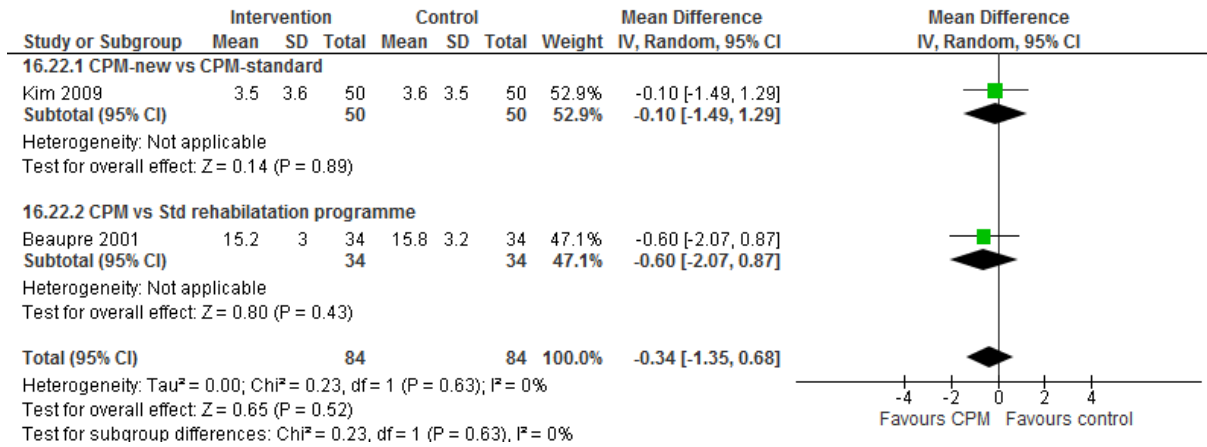

**eFigure 39: Subgroup Sensitivity Analysis Comparing Studies by Time (Studies Divided If Published Prior or Comprising Year 2000 or From 2001 Onwards)**

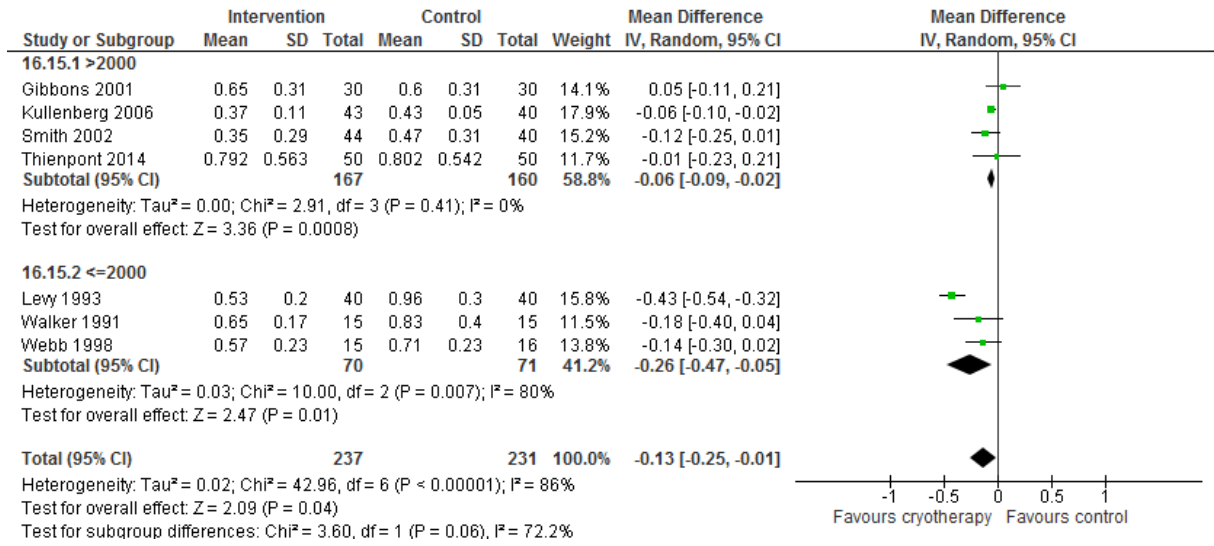

**eFigure 40: Subgroup Sensitivity Analysis Comparing Studies by Time (Studies Divided If Published Prior or Comprising Year 2000 or From 2001 Onwards)**

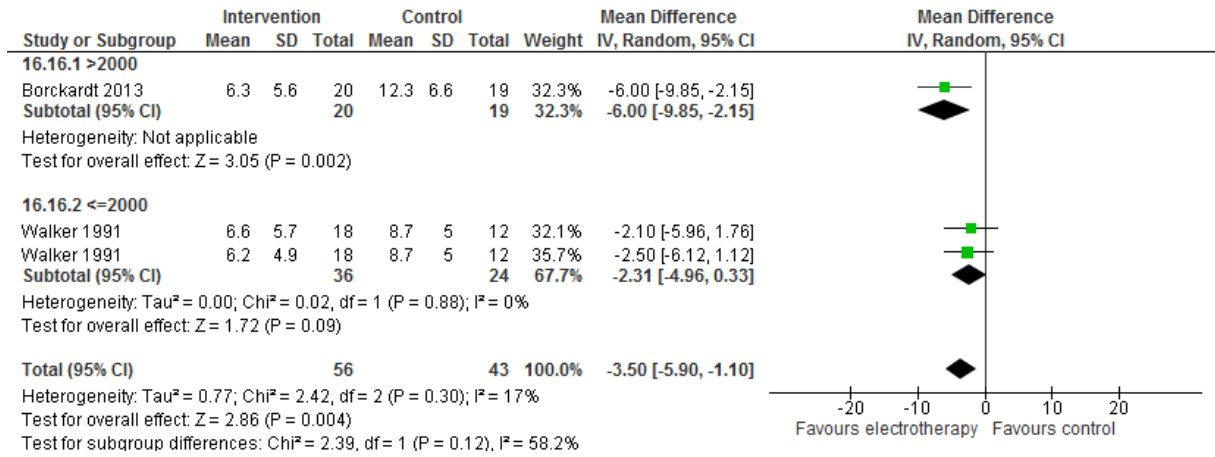

**eFigure 41: Results of the Meta-regression for the Distribution of Age in the Groups (Treatment vs Control)**

. metareg AGE Group, wsse ( SD)

```

Meta-regression                                Number of obs =      28
REML estimate of between-study variance        tau2              =    .6622
% residual variation due to heterogeneity      I-squared_res    =    0.00%
Proportion of between-study variance explained Adj R-squared    =   53.35%
With Knapp-Hartung modification
  
```

| AGE   | Coef.     | Std. Err. | t     | P> t  | [95% Conf. Interval] |          |
|-------|-----------|-----------|-------|-------|----------------------|----------|
| Group | -1.365645 | 1.703033  | -0.80 | 0.430 | -4.86628             | 2.134991 |
| _cons | 68.7297   | 1.19114   | 57.70 | 0.000 | 66.28128             | 71.17813 |

**eFigure 42: Results of the Meta-regression for the Distribution of Sex in the Groups (Treatment vs Control)**

. metareg SEX Group1, wsse ( SD1)

```

Meta-regression                                Number of obs =      57
REML estimate of between-study variance        tau2              =   213.6
% residual variation due to heterogeneity      I-squared_res    =   95.96%
Proportion of between-study variance explained Adj R-squared    =   -1.26%
With Knapp-Hartung modification
  
```

| SEX    | Coef.    | Std. Err. | t     | P> t  | [95% Conf. Interval] |          |
|--------|----------|-----------|-------|-------|----------------------|----------|
| Group1 | 2.310076 | 4.002792  | 0.58  | 0.566 | -5.711698            | 10.33185 |
| _cons  | 68.4375  | 3.045668  | 22.47 | 0.000 | 62.33385             | 74.54115 |
